# Supplementary material
Source: publisher figshare collection journal article supplement (https://gsajournals.figshare.com/ndownloader/files/14676755)
Supplement: Supplementary file 1 [file 14676755]

Pedigree	Year	Pass	Range	Rep	GossRating1	GossRating2	AvgGossRating
(B73 X Hp301)S5 Sib%B	2013	23	9	1	1	1	1
(B73 X Hp301)S5 Sib%B	2013	17	4	1	2	2	2
(B73 X Hp301)S5 Sib%B	2013	49	4	1	2	2	2
(B73 X Hp301)S5 Sib%B	2013	54	5	1	2	2	2
(B73 X Hp301)S5 Sib%B	2013	26	6	1	2	2	2
(B73 X Hp301)S5 Sib%B	2013	16	9	1	2	2	2
(B73 X Hp301)S5 Sib%B	2013	28	12	1	2	2	2
(B73 X Hp301)S5 Sib%B	2013	28	5	1	2	3	2.5
(B73 X Hp301)S5 Sib%B	2013	20	2	1	3	3	3
(B73 X Hp301)S5 Sib%B	2013	41	2	1	3	3	3
(B73 X Hp301)S5 Sib%B	2013	43	4	1	3	3	3
(B73 X Hp301)S5 Sib%B	2013	51	4	1	3	3	3
(B73 X Hp301)S5 Sib%B	2013	15	6	1	3	3	3
(B73 X Hp301)S5 Sib%B	2013	24	6	1	3	3	3
(B73 X Hp301)S5 Sib%B	2013	37	7	1	3	3	3
(B73 X Hp301)S5 Sib%B	2013	47	7	1	3	3	3
(B73 X Hp301)S5 Sib%B	2013	54	7	1	3	3	3
(B73 X Hp301)S5 Sib%B	2013	58	7	1	3	3	3
(B73 X Hp301)S5 Sib%B	2013	16	8	1	3	3	3
(B73 X Hp301)S5 Sib%B	2013	8	10	1	3	3	3
(B73 X Hp301)S5 Sib%B	2013	25	11	1	3	3	3
(B73 X Hp301)S5 Sib%B	2013	44	12	1	3	3	3
(B73 X Hp301)S5 Sib%B	2013	40	2	1	4	4	4
(B73 X Hp301)S5 Sib%B	2013	3	3	1	4	4	4
(B73 X Hp301)S5 Sib%B	2013	11	4	1	4	4	4
(B73 X Hp301)S5 Sib%B	2013	16	6	1	4	4	4
(B73 X Hp301)S5 Sib%B	2013	9	11	1	4	4	4
(B73 X Hp301)S5 Sib%B	2013	55	12	1	4	4	4
(B73 X Hp301)S5 Sib%B	2013	12	5	1	5	5	5
(B73 X Hp301)S5 Sib%B	2013	25	5	1	5	5	5
(B73 X Hp301)S5 Sib%B	2013	58	4	1	6	6	6
(B73 X Hp301)S5 Sib:2002-B%B	2013	17	3	1	4	4	4
(B73 X Hp301)S5 Sib:2002-B%B	2013	17	12	1	4	4	4
(B73 X Hp301)S5 Sib:2005-B	2013	38	2	1	3	3	3
(B73 X Hp301)S5 Sib:2005-B	2013	29	9	1	3	3	3
(B73 X Hp301)S5 Sib:2006-B	2013	42	2	1	2	2	2
(B73 X Hp301)S5 Sib:2006-B	2013	46	12	1	2	2	2
(B73 X Hp301)S5 Sib:2008-B	2013	45	5	1	2	2	2
(B73 X Hp301)S5 Sib:2008-B	2013	34	8	1	2	2	2
(B73 X Hp301)S5 Sib:2009-B	2013	39	7	1	4	4	4
(B73 X Hp301)S5 Sib:2010-B	2013	2	5	1	.	.	.
(B73 X Hp301)S5 Sib:2011-B	2013	34	2	1	3	3	3
(B73 X Hp301)S5 Sib:2011-B	2013	54	6	1	4	4	4
(B73 X Hp301)S5 Sib:2012-B	2013	24	2	1	2	2	2
(B73 X Hp301)S5 Sib:2012-B	2013	37	3	1	3	3	3
(B73 X Hp301)S5 Sib:2013-B	2013	9	3	1	3	3	3
(B73 X Hp301)S5 Sib:2013-B	2013	44	3	1	4	4	4
(B73 X Hp301)S5 Sib:2014-B	2013	16	5	1	2	2	2
(B73 X Hp301)S5 Sib:2014-B	2013	24	7	1	2	3	2.5
(B73 X Hp301)S5 Sib:2015-B	2013	28	6	1	3	3	3
(B73 X Hp301)S5 Sib:2015-B	2013	38	7	1	3	3	3
(B73 X Hp301)S5 Sib:2017-B	2013	48	6	1	2	2	2
(B73 X Hp301)S5 Sib:2017-B	2013	28	11	1	2	2	2
(B73 X Hp301)S5 Sib:2018-B	2013	10	5	1	3	3	3
(B73 X Hp301)S5 Sib:2018-B	2013	46	2	1	4	4	4
(B73 X Hp301)S5 Sib:2019-B	2013	35	6	1	2	2	2
(B73 X Hp301)S5 Sib:2019-B	2013	53	12	1	3	3	3
(B73 X Hp301)S5 Sib:2020-B	2013	41	12	1	1	1	1
(B73 X Hp301)S5 Sib:2020-B	2013	4	5	1	.	.	.
(B73 X Hp301)S5 Sib:2021-B	2013	27	6	1	4	4	4
(B73 X Hp301)S5 Sib:2021-B	2013	50	8	1	5	5	5
(B73 X Hp301)S5 Sib:2024-B	2013	39	12	1	4	3	3.5
(B73 X Hp301)S5 Sib:2024-B	2013	6	11	1	.	.	.
(B73 X Hp301)S5 Sib:2025-B	2013	13	11	1	1	1	1
(B73 X Hp301)S5 Sib:2026-B	2013	54	8	1	4	4	4
(B73 X Hp301)S5 Sib:2026-B	2013	4	11	1	.	.	.
(B73 X Hp301)S5 Sib:2027-B	2013	46	5	1	3	3	3
(B73 X Hp301)S5 Sib:2027-B	2013	58	6	1	4	4	4
(B73 X Hp301)S5 Sib:2028-B%B	2013	46	8	1	2	2	2
(B73 X Hp301)S5 Sib:2028-B%B	2013	49	6	1	3	3	3
(B73 X Hp301)S5 Sib:2030-B	2013	57	11	1	2	2	2
(B73 X Hp301)S5 Sib:2030-B	2013	37	12	1	2	2	2
(B73 X Hp301)S5 Sib:2031-B	2013	46	9	1	2	2	2
(B73 X Hp301)S5 Sib:2031-B	2013	21	2	1	3	3	3
(B73 X Hp301)S5 Sib:2032-B	2013	19	8	1	3	3	3
(B73 X Hp301)S5 Sib:2032-B	2013	38	10	1	3	3	3
(B73 X Hp301)S5 Sib:2033-B	2013	9	12	1	4	4	4
(B73 X Hp301)S5 Sib:2033-B	2013	7	6	1	.	.	.
(B73 X Hp301)S5 Sib:2034-B	2013	44	7	1	3	3	3
(B73 X Hp301)S5 Sib:2034-B	2013	6	8	1	.	.	.
(B73 X Hp301)S5 Sib:2036-B	2013	23	6	1	2	2	2
(B73 X Hp301)S5 Sib:2036-B	2013	52	3	1	3	3	3
(B73 X Hp301)S5 Sib:2037-B	2013	9	7	1	2	1	1.5
(B73 X Hp301)S5 Sib:2037-B	2013	44	10	1	2	2	2
(B73 X Hp301)S5 Sib:2038-B%B	2013	49	3	1	4	4	4
(B73 X Hp301)S5 Sib:2038-B%B	2013	55	5	1	4	4	4
(B73 X Hp301)S5 Sib:2039-B	2013	56	3	1	2	2	2
(B73 X Hp301)S5 Sib:2039-B	2013	21	7	1	2	2	2
(B73 X Hp301)S5 Sib:2040-B	2013	13	4	1	4	4	4
(B73 X Hp301)S5 Sib:2041-B	2013	38	8	1	3	3	3
(B73 X Hp301)S5 Sib:2041-B	2013	14	9	1	3	3	3
(B73 X Hp301)S5 Sib:2042-B%B	2013	10	7	1	3	3	3
(B73 X Hp301)S5 Sib:2042-B%B	2013	29	7	1	4	4	4
(B73 X Hp301)S5 Sib:2043-B	2013	8	6	1	.	.	.
(B73 X Hp301)S5 Sib:2043-B	2013	2	7	1	.	.	.
(B73 X Hp301)S5 Sib:2046-B	2013	15	10	1	1	1	1
(B73 X Hp301)S5 Sib:2046-B	2013	24	12	1	2	2	2
(B73 X Hp301)S5 Sib:2047-B	2013	19	12	1	2	2	2
(B73 X Hp301)S5 Sib:2047-B	2013	58	9	1	3	3	3
(B73 X Hp301)S5 Sib:2048-B	2013	47	5	1	3	3	3
(B73 X Hp301)S5 Sib:2048-B	2013	50	2	1	4	4	4
(B73 X Hp301)S5 Sib:2049-B	2013	16	3	1	2	2	2
(B73 X Hp301)S5 Sib:2049-B	2013	3	11	1	.	.	.
(B73 X Hp301)S5 Sib:2050-B	2013	30	4	1	2	2	2
(B73 X Hp301)S5 Sib:2050-B	2013	5	8	1	.	.	.
(B73 X Hp301)S5 Sib:2051-B	2013	31	4	1	3	3	3
(B73 X Hp301)S5 Sib:2051-B	2013	56	5	1	3	3	3
(B73 X Hp301)S5 Sib:2052-B%B	2013	35	4	1	2	2	2
(B73 X Hp301)S5 Sib:2052-B%B	2013	33	7	1	2	2	2
(B73 X Hp301)S5 Sib:2053-B	2013	6	3	1	4	4	4
(B73 X Hp301)S5 Sib:2053-B	2013	8	2	1	5	5	5
(B73 X Hp301)S5 Sib:2055-B%B	2013	39	10	1	1	1	1
(B73 X Hp301)S5 Sib:2055-B%B	2013	57	3	1	2	2	2
(B73 X Hp301)S5 Sib:2056-B%B	2013	55	8	1	2	2	2
(B73 X Hp301)S5 Sib:2056-B%B	2013	56	11	1	2	2	2
(B73 X Hp301)S5 Sib:2057-B%B	2013	28	2	1	2	2	2
(B73 X Hp301)S5 Sib:2057-B%B	2013	12	3	1	2	2	2
(B73 X Hp301)S5 Sib:2058-B	2013	8	8	1	2	2	2
(B73 X Hp301)S5 Sib:2058-B	2013	51	9	1	3	3	3
(B73 X Hp301)S5 Sib:2059-B	2013	14	3	1	2	2	2
(B73 X Hp301)S5 Sib:2059-B	2013	35	10	1	2	2	2
(B73 X Hp301)S5 Sib:2060-B	2013	50	7	1	4	4	4
(B73 X Hp301)S5 Sib:2060-B	2013	59	11	1	5	5	5
(B73 X Hp301)S5 Sib:2061-B	2013	48	2	1	4	4	4
(B73 X Hp301)S5 Sib:2061-B	2013	49	8	1	4	4	4
(B73 X Hp301)S5 Sib:2062-B%B	2013	48	4	1	3	2	2.5
(B73 X Hp301)S5 Sib:2062-B%B	2013	2	4	1	.	.	.
(B73 X Hp301)S5 Sib:2063-B%B	2013	14	8	1	3	2	2.5
(B73 X Hp301)S5 Sib:2063-B%B	2013	59	5	1	3	3	3
(B73 X Hp301)S5 Sib:2064-B	2013	52	8	1	3	3	3
(B73 X Hp301)S5 Sib:2066-B%B	2013	47	10	1	3	3	3
(B73 X Hp301)S5 Sib:2066-B%B	2013	48	11	1	3	3	3
(B73 X Hp301)S5 Sib:2067-B	2013	20	9	1	4	4	4
(B73 X Hp301)S5 Sib:2068-B	2013	6	7	1	.	.	.
(B73 X Hp301)S5 Sib:2070-B	2013	17	7	1	2	2	2
(B73 X Hp301)S5 Sib:2071-B%B	2013	2	9	1	.	.	.
(B73 X Hp301)S5 Sib:2072-B	2013	13	5	1	3	3	3
(B73 X Hp301)S5 Sib:2073-B	2013	44	6	1	5	5	5
(B73 X Hp301)S5 Sib:2074-B	2013	25	4	1	2	2	2
(B73 X Hp301)S5 Sib:2075-B	2013	13	10	1	3	3	3
(B73 X Hp301)S5 Sib:2076-B	2013	47	6	1	1	1	1
(B73 X Hp301)S5 Sib:2077-B	2013	47	4	1	3	3	3
(B73 X Hp301)S5 Sib:2079-B	2013	58	5	1	4	4	4
(B73 X Hp301)S5 Sib:2080-B	2013	53	8	1	2	2	2
(B73 X Hp301)S5 Sib:2082-B	2013	32	8	1	2	2	2
(B73 X Hp301)S5 Sib:2084-B	2013	7	12	1	.	.	.
(B73 X Hp301)S5 Sib:2085-B	2013	31	12	1	2	2	2
(B73 X Hp301)S5 Sib:2087-B	2013	22	4	1	3	3	3
(B73 X Hp301)S5 Sib:2089-B	2013	6	9	1	.	.	.
(B73 X Hp301)S5 Sib:2090-B	2013	45	7	1	4	4	4
(B73 X Hp301)S5 Sib:2091-B	2013	34	10	1	4	4	4
(B73 X Hp301)S5 Sib:2092-B	2013	44	8	1	3	3	3
(B73 X Hp301)S5 Sib:2093-B	2013	35	11	1	4	4	4
(B73 X Hp301)S5 Sib:2097-B%B	2013	48	12	1	3	3	3
(B73 X Hp301)S5 Sib:2098-B%B	2013	28	3	1	3	3	3
(B73 X Hp301)S5 Sib:2101-B	2013	50	3	1	3	3	3
(B73 X Hp301)S5 Sib:2102-B%B	2013	24	8	1	2	2	2
(B73 X Hp301)S5 Sib:2103-B	2013	30	11	1	3	3	3
(B73 X Hp301)S5 Sib:2105-B	2013	19	4	1	3	3	3
(B73 X Hp301)S5 Sib:2106-B	2013	55	3	1	2	2	2
(B73 X Hp301)S5 Sib:2107-B	2013	20	11	1	2	2	2
(B73 X Hp301)S5 Sib:2110-B%B	2013	49	12	1	3	3	3
(B73 X Hp301)S5 Sib:2111-B	2013	44	4	1	2	2	2
(B73 X Hp301)S5 Sib:2112-B%B	2013	26	10	1	2	3	2.5
(B73 X Hp301)S5 Sib:2113-B	2013	20	8	1	3	3	3
(B73 X Hp301)S5 Sib:2115-B	2013	32	7	1	3	3	3
(B73 X Hp301)S5 Sib:2116-B	2013	10	8	1	3	3	3
(B73 X Hp301)S5 Sib:2117-B	2013	58	12	1	2	2	2
(B73 X Hp301)S5 Sib:2118-B	2013	22	11	1	2	2	2
(B73 X Hp301)S5 Sib:2120-B	2013	37	9	1	3	3	3
(B73 X Hp301)S5 Sib:2121-B	2013	15	9	1	3	3	3
(B73 X Hp301)S5 Sib:2123-B	2013	22	7	1	.	.	.
(B73 X Hp301)S5 Sib:2124-B	2013	39	2	1	2	2	2
(B73 X Hp301)S5 Sib:2125-B%B	2013	29	5	1	3	4	3.5
(B73 X Hp301)S5 Sib:2126-B	2013	53	2	1	3	3	3
(B73 X Hp301)S5 Sib:2127-B	2013	53	11	1	3	3	3
(B73 X Hp301)S5 Sib:2128-B%B	2013	29	8	1	3	3	3
(B73 X Hp301)S5 Sib:2129-B	2013	59	2	1	4	4	4
(B73 X Hp301)S5 Sib:2130-B	2013	23	8	1	4	4	4
(B73 X Hp301)S5 Sib:2131-B	2013	32	9	1	3	3	3
(B73 X Hp301)S5 Sib:2132-B%B	2013	23	7	1	2	2	2
(B73 X Hp301)S5 Sib:2133-B	2013	58	10	1	2	2	2
(B73 X Hp301)S5 Sib:2134-B	2013	24	11	1	2	2	2
(B73 X Hp301)S5 Sib:2137-B%B	2013	34	7	1	3	3	3
(B73 X Hp301)S5 Sib:2138-B	2013	35	9	1	1	1	1
(B73 X Hp301)S5 Sib:2139-B%B	2013	19	9	1	3	3	3
(B73 X Hp301)S5 Sib:2142-B	2013	18	12	1	4	4	4
(B73 X Hp301)S5 Sib:2143-B	2013	21	9	1	2	2	2
(B73 X Hp301)S5 Sib:2144-B	2013	27	3	1	3	4	3.5
(B73 X Hp301)S5 Sib:2145-B	2013	7	7	1	.	.	.
(B73 X Hp301)S5 Sib:2146-B	2013	55	10	1	2	2	2
(B73 X Hp301)S5 Sib:2147-B	2013	22	6	1	4	4	4
(B73 X Hp301)S5 Sib:2148-B	2013	21	4	1	2	2	2
(B73 X Hp301)S5 Sib:2150-B%B	2013	57	12	1	2	2	2
(B73 X Oh43)S5 Sib%B	2013	2	2	1	1	1	1
(B73 X Oh43)S5 Sib%B	2013	9	2	1	1	1	1
(B73 X Oh43)S5 Sib%B	2013	18	2	1	1	1	1
(B73 X Oh43)S5 Sib%B	2013	36	3	1	1	1	1
(B73 X Oh43)S5 Sib%B	2013	59	4	1	1	1	1
(B73 X Oh43)S5 Sib%B	2013	9	6	1	1	1	1
(B73 X Oh43)S5 Sib%B	2013	57	8	1	1	1	1
(B73 X Oh43)S5 Sib%B	2013	47	9	1	1	1	1
(B73 X Oh43)S5 Sib%B	2013	40	12	1	1	1	1
(B73 X Oh43)S5 Sib%B	2013	48	3	1	2	2	2
(B73 X Oh43)S5 Sib%B	2013	52	5	1	2	2	2
(B73 X Oh43)S5 Sib%B	2013	53	7	1	2	2	2
(B73 X Oh43)S5 Sib%B	2013	25	8	1	2	2	2
(B73 X Oh43)S5 Sib%B	2013	36	9	1	2	2	2
(B73 X Oh43)S5 Sib%B	2013	40	9	1	2	2	2
(B73 X Oh43)S5 Sib%B	2013	18	11	1	2	2	2
(B73 X Oh43)S5 Sib%B	2013	30	2	1	3	3	3
(B73 X Oh43)S5 Sib%B	2013	24	3	1	3	3	3
(B73 X Oh43)S5 Sib%B	2013	26	3	1	3	3	3
(B73 X Oh43)S5 Sib%B	2013	19	6	1	3	3	3
(B73 X Oh43)S5 Sib%B	2013	50	6	1	3	3	3
(B73 X Oh43)S5 Sib%B	2013	48	7	1	3	3	3
(B73 X Oh43)S5 Sib%B	2013	47	8	1	3	3	3
(B73 X Oh43)S5 Sib%B	2013	42	9	1	3	3	3
(B73 X Oh43)S5 Sib%B	2013	27	12	1	3	3	3
(B73 X Oh43)S5 Sib%B	2013	45	12	1	3	3	3
(B73 X Oh43)S5 Sib%B	2013	6	2	1	4	4	4
(B73 X Oh43)S5 Sib%B	2013	39	3	1	4	4	4
(B73 X Oh43)S5 Sib%B	2013	40	7	1	4	4	4
(B73 X Oh43)S5 Sib%B	2013	45	11	1	4	4	4
(B73 X Oh43)S5 Sib%B	2013	20	12	1	4	4	4
(B73 X Oh43)S5 Sib%B	2013	36	12	1	4	4	4
(B73 X Oh43)S5 Sib%B	2013	12	7	1	5	5	5
(B73 X Oh43)S5 Sib%B	2013	34	11	1	5	5	5
(B73 X Oh43)S5 Sib%B	2013	3	5	1	.	.	.
(B73 X Oh43)S5 Sib%B	2013	4	6	1	.	.	.
(B73 X Oh43)S5 Sib%B	2013	3	7	1	.	.	.
(B73 X Oh43)S5 Sib%B	2013	3	8	1	.	.	.
(B73 X Oh43)S5 Sib%B	2013	3	9	1	.	.	.
(B73 X Oh43)S5 Sib%B	2013	4	9	1	.	.	.
(B73 X Oh43)S5 Sib%B	2013	5	11	1	.	.	.
(B73 X Oh43)S5 Sib%B	2013	2	12	1	.	.	.
(B73 X Oh43)S5 Sib:2151-B	2013	32	4	1	4	4	4
(B73 X Oh43)S5 Sib:2151-B	2013	32	10	1	4	4	4
(B73 X Oh43)S5 Sib:2152-B	2013	19	2	1	1	1	1
(B73 X Oh43)S5 Sib:2152-B	2013	17	8	1	1	1	1
(B73 X Oh43)S5 Sib:2154-B	2013	55	9	1	1	1	1
(B73 X Oh43)S5 Sib:2154-B	2013	59	12	1	1	1	1
(B73 X Oh43)S5 Sib:2155-B	2013	34	6	1	3	3	3
(B73 X Oh43)S5 Sib:2155-B	2013	5	5	1	.	.	.
(B73 X Oh43)S5 Sib:2156-B	2013	29	3	1	3	3	3
(B73 X Oh43)S5 Sib:2156-B	2013	52	6	1	5	5	5
(B73 X Oh43)S5 Sib:2157-B	2013	33	2	1	4	4	4
(B73 X Oh43)S5 Sib:2157-B	2013	3	10	1	.	.	.
(B73 X Oh43)S5 Sib:2158-B	2013	16	11	1	2	2	2
(B73 X Oh43)S5 Sib:2158-B	2013	56	12	1	2	2	2
(B73 X Oh43)S5 Sib:2159-B	2013	15	4	1	4	4	4
(B73 X Oh43)S5 Sib:2159-B	2013	5	6	1	.	.	.
(B73 X Oh43)S5 Sib:2160-B	2013	14	2	1	1	1	1
(B73 X Oh43)S5 Sib:2160-B	2013	30	7	1	2	2	2
(B73 X Oh43)S5 Sib:2161-B	2013	57	9	1	1	2	1.5
(B73 X Oh43)S5 Sib:2161-B	2013	27	9	1	2	2	2
(B73 X Oh43)S5 Sib:2162-B	2013	11	11	1	4	4	4
(B73 X Oh43)S5 Sib:2162-B	2013	44	11	1	4	4	4
(B73 X Oh43)S5 Sib:2163-B	2013	25	12	1	2	2	2
(B73 X Oh43)S5 Sib:2163-B	2013	43	3	1	3	3	3
(B73 X Oh43)S5 Sib:2164-B	2013	17	5	1	1	1	1
(B73 X Oh43)S5 Sib:2164-B	2013	27	5	1	2	2	2
(B73 X Oh43)S5 Sib:2165-B	2013	33	6	1	3	3	3
(B73 X Oh43)S5 Sib:2165-B	2013	22	10	1	3	3	3
(B73 X Oh43)S5 Sib:2166-B	2013	29	6	1	2	2	2
(B73 X Oh43)S5 Sib:2166-B	2013	52	12	1	2	2	2
(B73 X Oh43)S5 Sib:2167-B	2013	46	3	1	3	3	3
(B73 X Oh43)S5 Sib:2167-B	2013	46	7	1	3	3	3
(B73 X Oh43)S5 Sib:2168-B	2013	30	3	1	3	3	3
(B73 X Oh43)S5 Sib:2168-B	2013	13	9	1	3	3	3
(B73 X Oh43)S5 Sib:2169-B	2013	56	7	1	4	5	4.5
(B73 X Oh43)S5 Sib:2169-B	2013	27	2	1	5	5	5
(B73 X Oh43)S5 Sib:2170-B%B	2013	13	7	1	3	3	3
(B73 X Oh43)S5 Sib:2170-B%B	2013	27	11	1	3	3	3
(B73 X Oh43)S5 Sib:2171-B	2013	20	4	1	2	2	2
(B73 X Oh43)S5 Sib:2171-B	2013	4	7	1	.	.	.
(B73 X Oh43)S5 Sib:2172-B	2013	23	4	1	3	3	3
(B73 X Oh43)S5 Sib:2172-B	2013	45	4	1	3	3	3
(B73 X Oh43)S5 Sib:2174-B	2013	38	4	1	4	4	4
(B73 X Oh43)S5 Sib:2174-B	2013	20	10	1	4	4	4
(B73 X Oh43)S5 Sib:2175-B	2013	19	5	1	1	1	1
(B73 X Oh43)S5 Sib:2175-B	2013	23	12	1	2	2	2
(B73 X Oh43)S5 Sib:2176-B	2013	10	3	1	4	4	4
(B73 X Oh43)S5 Sib:2176-B	2013	42	8	1	4	4	4
(B73 X Oh43)S5 Sib:2177-B%B	2013	45	3	1	3	3	3
(B73 X Oh43)S5 Sib:2177-B%B	2013	15	3	1	4	4	4
(B73 X Oh43)S5 Sib:2178-B	2013	23	3	1	2	2	2
(B73 X Oh43)S5 Sib:2178-B	2013	34	4	1	2	2	2
(B73 X Oh43)S5 Sib:2179-B	2013	12	9	1	3	3	3
(B73 X Oh43)S5 Sib:2179-B	2013	4	8	1	.	.	.
(B73 X Oh43)S5 Sib:2180-B	2013	18	3	1	3	3	3
(B73 X Oh43)S5 Sib:2180-B	2013	29	11	1	4	3	3.5
(B73 X Oh43)S5 Sib:2181-B	2013	21	3	1	1	1	1
(B73 X Oh43)S5 Sib:2181-B	2013	16	2	1	3	3	3
(B73 X Oh43)S5 Sib:2183-B	2013	50	4	1	1	1	1
(B73 X Oh43)S5 Sib:2183-B	2013	2	10	1	.	.	.
(B73 X Oh43)S5 Sib:2184-B	2013	41	6	1	3	4	3.5
(B73 X Oh43)S5 Sib:2184-B	2013	13	6	1	4	5	4.5
(B73 X Oh43)S5 Sib:2185-B	2013	34	12	1	3	3	3
(B73 X Oh43)S5 Sib:2185-B	2013	47	2	1	4	3	3.5
(B73 X Oh43)S5 Sib:2186-B	2013	21	10	1	4	4	4
(B73 X Oh43)S5 Sib:2186-B	2013	54	11	1	4	4	4
(B73 X Oh43)S5 Sib:2187-B	2013	59	7	1	1	1	1
(B73 X Oh43)S5 Sib:2187-B	2013	37	2	1	1	2	1.5
(B73 X Oh43)S5 Sib:2188-B	2013	32	12	1	2	2	2
(B73 X Oh43)S5 Sib:2188-B	2013	6	12	1	.	.	.
(B73 X Oh43)S5 Sib:2189-B	2013	5	3	1	2	1	1.5
(B73 X Oh43)S5 Sib:2189-B	2013	48	5	1	2	2	2
(B73 X Oh43)S5 Sib:2190-B	2013	35	2	1	1	1	1
(B73 X Oh43)S5 Sib:2190-B	2013	32	3	1	1	1	1
(B73 X Oh43)S5 Sib:2191-B	2013	3	4	1	2	2	2
(B73 X Oh43)S5 Sib:2191-B	2013	12	6	1	2	2	2
(B73 X Oh43)S5 Sib:2193-B	2013	43	12	1	3	3	3
(B73 X Oh43)S5 Sib:2193-B	2013	51	2	1	3	4	3.5
(B73 X Oh43)S5 Sib:2194-B	2013	42	5	1	2	2	2
(B73 X Oh43)S5 Sib:2194-B	2013	46	10	1	2	2	2
(B73 X Oh43)S5 Sib:2195-B	2013	59	8	1	2	2	2
(B73 X Oh43)S5 Sib:2195-B	2013	23	11	1	2	2	2
(B73 X Oh43)S5 Sib:2196-B	2013	11	5	1	3	4	3.5
(B73 X Oh43)S5 Sib:2196-B	2013	50	9	1	5	5	5
(B73 X Oh43)S5 Sib:2197-B	2013	26	12	1	4	4	4
(B73 X Oh43)S5 Sib:2197-B	2013	23	10	1	5	5	5
(B73 X Oh43)S5 Sib:2198-B	2013	14	10	1	1	1	1
(B73 X Oh43)S5 Sib:2198-B	2013	49	2	1	2	2	2
(B73 X Oh43)S5 Sib:2201-B	2013	44	5	1	2	2	2
(B73 X Oh43)S5 Sib:2201-B	2013	27	10	1	3	3	3
(B73 X Oh43)S5 Sib:2203-B	2013	57	7	1	3	3	3
(B73 X Oh43)S5 Sib:2203-B	2013	31	10	1	3	3	3
(B73 X Oh43)S5 Sib:2204-B	2013	55	2	1	1	1	1
(B73 X Oh43)S5 Sib:2204-B	2013	52	2	1	1	2	1.5
(B73 X Oh43)S5 Sib:2205-B	2013	27	8	1	2	3	2.5
(B73 X Oh43)S5 Sib:2205-B	2013	45	2	1	3	3	3
(B73 X Oh43)S5 Sib:2207-B%B	2013	28	7	1	3	2	2.5
(B73 X Oh43)S5 Sib:2208-B	2013	12	8	1	1	1	1
(B73 X Oh43)S5 Sib:2209-B	2013	9	10	1	3	3	3
(B73 X Oh43)S5 Sib:2210-B	2013	2	11	1	.	.	.
(B73 X Oh43)S5 Sib:2211-B	2013	43	11	1	3	3	3
(B73 X Oh43)S5 Sib:2212-B	2013	36	10	1	3	3	3
(B73 X Oh43)S5 Sib:2213-B	2013	11	9	1	4	4	4
(B73 X Oh43)S5 Sib:2214-B	2013	34	5	1	1	1	1
(B73 X Oh43)S5 Sib:2215-B	2013	14	5	1	3	3	3
(B73 X Oh43)S5 Sib:2216-B	2013	17	6	1	2	2	2
(B73 X Oh43)S5 Sib:2217-B	2013	49	7	1	5	5	5
(B73 X Oh43)S5 Sib:2218-B	2013	7	2	1	3	3	3
(B73 X Oh43)S5 Sib:2219-B	2013	42	3	1	1	1	1
(B73 X Oh43)S5 Sib:2220-B	2013	20	6	1	2	2	2
(B73 X Oh43)S5 Sib:2221-B	2013	14	4	1	5	5	5
(B73 X Oh43)S5 Sib:2222-B	2013	57	5	1	3	3	3
(B73 X Oh43)S5 Sib:2223-B	2013	38	11	1	3	3	3
(B73 X Oh43)S5 Sib:2226-B	2013	42	7	1	5	5	5
(B73 X Oh43)S5 Sib:2227-B	2013	4	10	1	.	.	.
(B73 X Oh43)S5 Sib:2228-B	2013	40	4	1	2	2	2
(B73 X Oh43)S5 Sib:2229-B	2013	26	7	1	3	3	3
(B73 X Oh43)S5 Sib:2230-B	2013	28	9	1	2	2	2
(B73 X Oh43)S5 Sib:2231-B	2013	32	6	1	2	2	2
(B73 X Oh43)S5 Sib:2232-B	2013	49	10	1	3	3	3
(B73 X Oh43)S5 Sib:2233-B	2013	43	7	1	3	4	3.5
(B73 X Oh43)S5 Sib:2234-B	2013	51	8	1	3	3	3
(B73 X Oh43)S5 Sib:2235-B	2013	22	3	1	2	2	2
(B73 X Oh43)S5 Sib:2236-B	2013	41	11	1	2	3	2.5
(B73 X Oh43)S5 Sib:2237-B	2013	59	9	1	4	4	4
(B73 X Oh43)S5 Sib:2238-B	2013	39	5	1	2	2	2
(B73 X Oh43)S5 Sib:2239-B	2013	41	10	1	4	3	3.5
(B73 X Oh43)S5 Sib:2240-B	2013	41	3	1	2	1	1.5
(B73 X Oh43)S5 Sib:2241-B	2013	42	10	1	1	1	1
(B73 X Oh43)S5 Sib:2242-B	2013	53	10	1	3	3	3
(B73 X Oh43)S5 Sib:2243-B	2013	29	12	1	2	1	1.5
(B73 X Oh43)S5 Sib:2244-B	2013	25	2	1	2	2	2
(B73 X Oh43)S5 Sib:2245-B	2013	41	9	1	3	3	3
(B73 X Oh43)S5 Sib:2246-B	2013	12	4	1	4	4	4
(B73 X Oh43)S5 Sib:2247-B	2013	5	2	1	4	6	5
(B73 X Oh43)S5 Sib:2248-B	2013	26	9	1	2	2	2
(B73 X Oh43)S5 Sib:2249-B	2013	36	2	1	2	2	2
(B73 X Oh43)S5 Sib:2250-B	2013	19	11	1	4	4	4
(B73 X Oh43)S5 Sib:2251-B	2013	46	6	1	2	2	2
(B73 X Oh43)S5 Sib:2252-B	2013	54	3	1	2	2	2
(B73 X Oh43)S5 Sib:2253-B	2013	54	9	1	1	1	1
(B73 X Oh43)S5 Sib:2254-B	2013	24	5	1	2	2	2
(B73 X Oh43)S5 Sib:2255-B%B	2013	41	8	1	4	4	4
(B73 X Oh43)S5 Sib:2256-B	2013	40	3	1	4	4	4
(B73 X Oh43)S5 Sib:2257-B	2013	52	9	1	3	3	3
(B73 X Oh43)S5 Sib:2258-B	2013	8	5	1	1	1	1
(B73 X Oh43)S5 Sib:2259-B	2013	8	11	1	.	.	.
(B73 X Oh43)S5 Sib:2260-B	2013	57	10	1	4	4	4
(B73 X Oh43)S5 Sib:2261-B	2013	35	5	1	3	4	3.5
(B73 X Oh43)S5 Sib:2262-B	2013	31	7	1	4	4	4
(B73 X Oh43)S5 Sib:2263-B	2013	51	3	1	1	1	1
(B73 X Oh43)S5 Sib:2264-B	2013	54	2	1	2	2	2
(B73 X Oh43)S5 Sib:2265-B	2013	41	5	1	2	3	2.5
(B73 X Oh43)S5 Sib:2266-B	2013	58	8	1	5	5	5
(B73 X Oh43)S5 Sib:2267-B%B	2013	28	4	1	3	3	3
(B73 X Oh43)S5 Sib:2269-B	2013	36	8	1	2	2	2
(B73 X Oh43)S5 Sib:2270-B	2013	43	9	1	1	1	1
(B73 X Oh43)S5 Sib:2271-B	2013	7	11	1	.	.	.
(B73 X Oh43)S5 Sib:2272-B	2013	21	5	1	2	2	2
(B73 X Oh43)S5 Sib:2273-B	2013	22	5	1	3	3	3
(B73 X Oh43)S5 Sib:2274-B	2013	31	8	1	3	4	3.5
(B73 X Oh43)S5 Sib:2275-B	2013	13	3	1	2	2	2
(B73 X Oh43)S5 Sib:2276-B	2013	53	9	1	2	2	2
(B73 X Oh43)S5 Sib:2277-B	2013	38	9	1	4	4	4
(B73 X Oh43)S5 Sib:2278-B	2013	22	2	1	3	3	3
(B73 X Oh43)S5 Sib:2279-B	2013	7	4	1	2	2	2
(B73 X Oh43)S5 Sib:2281-B	2013	56	2	1	4	5	4.5
(B73 X Oh43)S5 Sib:2282-B	2013	24	9	1	2	2	2
(B73 X Oh43)S5 Sib:2283-B	2013	25	10	1	1	1	1
(B73 X Oh43)S5 Sib:2284-B	2013	55	6	1	2	2	2
(B73 X Oh43)S5 Sib:2285-B	2013	55	11	1	4	4	4
(B73 X Oh43)S5 Sib:2286-B	2013	29	4	1	1	2	1.5
(B73 X Oh43)S5 Sib:2287-B	2013	15	2	1	3	3	3
(B73 X Oh43)S5 Sib:2288-B	2013	33	3	1	2	2	2
(B73 X Oh43)S5 Sib:2289-B	2013	31	3	1	4	4	4
(B73 X Oh43)S5 Sib:2290-B	2013	43	2	1	1	1	1
(B73 X Oh43)S5 Sib:2291-B	2013	14	7	1	3	3	3
(B73 X Oh43)S5 Sib:2292-B	2013	50	12	1	2	2	2
(B73 X Oh43)S5 Sib:2294-B	2013	53	3	1	5	4	4.5
(B73 X Oh43)S5 Sib:2295-B	2013	27	4	1	3	3	3
(B73 X Oh43)S5 Sib:2296-B	2013	5	10	1	.	.	.
(B73 X Oh43)S5 Sib:2298-B	2013	8	9	1	2	2	2
(B73 X Oh43)S5 Sib:2299-B	2013	43	10	1	1	1	1
(B73 X Oh43)S5 Sib:2300-B%B	2013	30	6	1	4	4	4
(B73 X P39)S5 Sib%B	2013	44	2	1	1	1	1
(B73 X P39)S5 Sib%B	2013	33	8	1	1	1	1
(B73 X P39)S5 Sib%B	2013	26	11	1	2	2	2
(B73 X P39)S5 Sib%B	2013	16	12	1	2	2	2
(B73 X P39)S5 Sib%B	2013	12	2	1	3	3	3
(B73 X P39)S5 Sib%B	2013	19	3	1	3	3	3
(B73 X P39)S5 Sib%B	2013	51	5	1	3	3	3
(B73 X P39)S5 Sib%B	2013	36	6	1	3	3	3
(B73 X P39)S5 Sib%B	2013	9	5	1	3	4	3.5
(B73 X P39)S5 Sib%B	2013	31	2	1	4	4	4
(B73 X P39)S5 Sib%B	2013	59	6	1	4	4	4
(B73 X P39)S5 Sib%B	2013	25	7	1	4	4	4
(B73 X P39)S5 Sib%B	2013	9	8	1	4	5	4.5
(B73 X P39)S5 Sib%B	2013	10	11	1	5	5	5
(B73 X P39)S5 Sib%B	2013	12	11	1	5	5	5
(B73 X P39)S5 Sib%B	2013	6	6	1	.	.	.
(B73 X P39)S5 Sib%B	2013	7	9	1	.	.	.
(B73 X P39)S5 Sib:2301-B	2013	10	4	1	2	2	2
(B73 X P39)S5 Sib:2301-B	2013	48	8	1	2	2	2
(B73 X P39)S5 Sib:2303-B	2013	43	6	1	1	1	1
(B73 X P39)S5 Sib:2303-B	2013	51	6	1	2	2	2
(B73 X P39)S5 Sib:2305-B%B	2013	37	5	1	3	3	3
(B73 X P39)S5 Sib:2305-B%B	2013	10	12	1	3	3	3
(B73 X P39)S5 Sib:2307-B%B	2013	41	7	1	1	2	1.5
(B73 X P39)S5 Sib:2307-B%B	2013	32	5	1	2	3	2.5
(B73 X P39)S5 Sib:2308-B	2013	11	2	1	1	2	1.5
(B73 X P39)S5 Sib:2308-B	2013	57	6	1	2	2	2
(B73 X P39)S5 Sib:2309-B%B	2013	13	12	1	4	4	4
(B73 X P39)S5 Sib:2309-B%B	2013	29	2	1	5	5	5
(B73 X P39)S5 Sib:2310-B	2013	18	4	1	3	3	3
(B73 X P39)S5 Sib:2310-B	2013	38	6	1	4	4	4
(B73 X P39)S5 Sib:2314-B	2013	15	5	1	3	3	3
(B73 X P39)S5 Sib:2314-B	2013	32	11	1	4	4	4
(B73 X P39)S5 Sib:2315-B%B	2013	34	3	1	3	4	3.5
(B73 X P39)S5 Sib:2315-B%B	2013	11	8	1	3	4	3.5
(B73 X P39)S5 Sib:2317-B	2013	17	11	1	3	3	3
(B73 X P39)S5 Sib:2317-B	2013	4	4	1	4	4	4
(B73 X P39)S5 Sib:2319-B	2013	15	7	1	3	4	3.5
(B73 X P39)S5 Sib:2319-B	2013	16	7	1	3	4	3.5
(B73 X P39)S5 Sib:2321-B	2013	37	4	1	3	3	3
(B73 X P39)S5 Sib:2321-B	2013	6	4	1	4	4	4
(B73 X P39)S5 Sib:2322-B	2013	4	2	1	3	3	3
(B73 X P39)S5 Sib:2322-B	2013	31	11	1	3	4	3.5
(B73 X P39)S5 Sib:2323-B	2013	25	6	1	1	2	1.5
(B73 X P39)S5 Sib:2323-B	2013	3	12	1	.	.	.
(B73 X P39)S5 Sib:2324-B	2013	56	4	1	2	3	2.5
(B73 X P39)S5 Sib:2326-B	2013	56	10	1	1	1	1
(B73 X P39)S5 Sib:2326-B	2013	35	7	1	2	2	2
(B73 X P39)S5 Sib:2327-B	2013	4	3	1	1	1	1
(B73 X P39)S5 Sib:2327-B	2013	12	12	1	2	2	2
(B73 X P39)S5 Sib:2328-B	2013	18	6	1	2	2	2
(B73 X P39)S5 Sib:2328-B	2013	49	11	1	2	2	2
(B73 X P39)S5 Sib:2329-B	2013	35	12	1	2	2	2
(B73 X P39)S5 Sib:2330-B	2013	11	3	1	1	1	1
(B73 X P39)S5 Sib:2330-B	2013	37	6	1	2	2	2
(B73 X P39)S5 Sib:2331-B	2013	5	12	1	.	.	.
(B73 X P39)S5 Sib:2334-B	2013	51	12	1	1	1	1
(B73 X P39)S5 Sib:2334-B	2013	25	3	1	2	2	2
(B73 X P39)S5 Sib:2335-B	2013	34	9	1	2	2	2
(B73 X P39)S5 Sib:2335-B	2013	39	11	1	2	2	2
(B73 X P39)S5 Sib:2337-B	2013	56	9	1	3	3	3
(B73 X P39)S5 Sib:2337-B	2013	10	9	1	4	4	4
(B73 X P39)S5 Sib:2338-B%B	2013	55	4	1	3	3	3
(B73 X P39)S5 Sib:2338-B%B	2013	21	8	1	3	3	3
(B73 X P39)S5 Sib:2339-B	2013	50	5	1	3	3	3
(B73 X P39)S5 Sib:2339-B	2013	13	8	1	3	3	3
(B73 X P39)S5 Sib:2341-B	2013	19	10	1	1	2	1.5
(B73 X P39)S5 Sib:2341-B	2013	11	7	1	2	2	2
(B73 X P39)S5 Sib:2342-B	2013	37	11	1	3	3	3
(B73 X P39)S5 Sib:2342-B	2013	50	11	1	3	3	3
(B73 X P39)S5 Sib:2344-B	2013	59	10	1	3	3	3
(B73 X P39)S5 Sib:2344-B	2013	8	3	1	5	5	5
(B73 X P39)S5 Sib:2345-B	2013	23	2	1	3	3	3
(B73 X P39)S5 Sib:2345-B	2013	30	9	1	4	4	4
(B73 X P39)S5 Sib:2346-B	2013	17	2	1	2	2	2
(B73 X P39)S5 Sib:2346-B	2013	49	9	1	2	2	2
(B73 X P39)S5 Sib:2347-B	2013	45	6	1	2	2	2
(B73 X P39)S5 Sib:2347-B	2013	14	12	1	2	2	2
(B73 X P39)S5 Sib:2348-B%B	2013	39	8	1	1	1	1
(B73 X P39)S5 Sib:2348-B%B	2013	33	11	1	2	2	2
(B73 X P39)S5 Sib:2351-B	2013	52	10	1	1	1	1
(B73 X P39)S5 Sib:2353-B	2013	45	8	1	1	2	1.5
(B73 X P39)S5 Sib:2353-B	2013	27	7	1	4	4	4
(B73 X P39)S5 Sib:2354-B	2013	11	12	1	1	1	1
(B73 X P39)S5 Sib:2354-B	2013	11	6	1	2	2	2
(B73 X P39)S5 Sib:2355-B	2013	51	7	1	2	2	2
(B73 X P39)S5 Sib:2355-B	2013	42	11	1	2	2	2
(B73 X P39)S5 Sib:2356-B	2013	43	5	1	2	2	2
(B73 X P39)S5 Sib:2356-B	2013	54	10	1	2	2	2
(B73 X P39)S5 Sib:2357-B%B	2013	45	9	1	2	2	2
(B73 X P39)S5 Sib:2357-B%B	2013	37	8	1	2	3	2.5
(B73 X P39)S5 Sib:2358-B	2013	31	6	1	2	2	2
(B73 X P39)S5 Sib:2358-B	2013	40	6	1	3	3	3
(B73 X P39)S5 Sib:2360-B	2013	54	12	1	3	3	3
(B73 X P39)S5 Sib:2362-B	2013	20	3	1	2	3	2.5
(B73 X P39)S5 Sib:2362-B	2013	57	2	1	3	3	3
(B73 X P39)S5 Sib:2363-B	2013	22	12	1	3	3	3
(B73 X P39)S5 Sib:2363-B	2013	5	7	1	.	.	.
(B73 X P39)S5 Sib:2364-B	2013	30	10	1	2	2	2
(B73 X P39)S5 Sib:2364-B	2013	45	10	1	2	2	2
(B73 X P39)S5 Sib:2365-B	2013	43	8	1	2	2	2
(B73 X P39)S5 Sib:2365-B	2013	33	9	1	2	2	2
(B73 X P39)S5 Sib:2366-B	2013	22	9	1	.	.	.
(B73 X P39)S5 Sib:2366-B	2013	28	10	1	.	.	.
(B73 X P39)S5 Sib:2367-B	2013	44	9	1	3	3	3
(B73 X P39)S5 Sib:2367-B	2013	15	12	1	3	3	3
(B73 X P39)S5 Sib:2368-B	2013	54	4	1	2	2	2
(B73 X P39)S5 Sib:2368-B	2013	26	5	1	3	3	3
(B73 X P39)S5 Sib:2369-B	2013	42	6	1	2	2	2
(B73 X P39)S5 Sib:2369-B	2013	56	8	1	3	3	3
(B73 X P39)S5 Sib:2370-B%B	2013	31	9	1	4	4	4
(B73 X P39)S5 Sib:2370-B%B	2013	6	5	1	.	.	.
(B73 X P39)S5 Sib:2371-B	2013	53	6	1	1	1	1
(B73 X P39)S5 Sib:2371-B	2013	58	2	1	2	2	2
(B73 X P39)S5 Sib:2372-B	2013	18	5	1	4	4	4
(B73 X P39)S5 Sib:2372-B	2013	57	4	1	6	6	6
(B73 X P39)S5 Sib:2373-B	2013	38	5	1	2	2	2
(B73 X P39)S5 Sib:2373-B	2013	32	2	1	3	3	3
(B73 X P39)S5 Sib:2374-B	2013	8	7	1	.	.	.
(B73 X P39)S5 Sib:2375-B	2013	48	9	1	3	3	3
(B73 X P39)S5 Sib:2376-B	2013	40	8	1	3	2	2.5
(B73 X P39)S5 Sib:2377-B	2013	16	4	1	2	2	2
(B73 X P39)S5 Sib:2378-B	2013	7	10	1	.	.	.
(B73 X P39)S5 Sib:2379-B	2013	52	4	1	1	1	1
(B73 X P39)S5 Sib:2380-B	2013	41	4	1	2	2	2
(B73 X P39)S5 Sib:2381-B	2013	36	7	1	2	2	2
(B73 X P39)S5 Sib:2382-B	2013	2	8	1	.	.	.
(B73 X P39)S5 Sib:2383-B	2013	35	3	1	1	1	1
(B73 X P39)S5 Sib:2384-B	2013	13	2	1	1	1	1
(B73 X P39)S5 Sib:2386-B	2013	10	2	1	2	2	2
(B73 X P39)S5 Sib:2387-B	2013	42	4	1	3	3	3
(B73 X P39)S5 Sib:2388-B	2013	25	9	1	1	1	1
(B73 X P39)S5 Sib:2389-B	2013	59	3	1	2	2	2
(B73 X P39)S5 Sib:2390-B	2013	36	5	1	4	4	4
(B73 X P39)S5 Sib:2391-B%B	2013	39	9	1	1	1	1
(B73 X P39)S5 Sib:2392-B	2013	9	4	1	2	3	2.5
(B73 X P39)S5 Sib:2393-B%B	2013	39	4	1	1	2	1.5
(B73 X P39)S5 Sib:2394-B	2013	9	9	1	2	2	2
(B73 X P39)S5 Sib:2396-B	2013	7	3	1	2	2	2
(B73 X P39)S5 Sib:2397-B	2013	30	8	1	1	1	1
(B73 X P39)S5 Sib:2398-B	2013	47	3	1	2	2	2
(B73 X P39)S5 Sib:2399-B	2013	39	6	1	2	2	2
(B73 X P39)S5 Sib:2400-B	2013	11	10	1	1	1	1
(B73 X P39)S5 Sib:2401-B%B	2013	12	10	1	1	1	1
(B73 X P39)S5 Sib:2403-B%B	2013	15	11	1	4	4	4
(B73 X P39)S5 Sib:2404-B	2013	7	8	1	.	.	.
(B73 X P39)S5 Sib:2404-B%B	2013	56	6	1	2	2	2
(B73 X P39)S5 Sib:2405-B	2013	36	4	1	2	3	2.5
(B73 X P39)S5 Sib:2406-B	2013	21	6	1	3	3	3
(B73 X P39)S5 Sib:2407-B	2013	58	11	1	2	2	2
(B73 X P39)S5 Sib:2408-B	2013	30	12	1	.	.	.
(B73 X P39)S5 Sib:2408-B%B	2013	46	11	1	.	.	.
(B73 X P39)S5 Sib:2409-B	2013	18	9	1	2	2	2
(B73 X P39)S5 Sib:2410-B	2013	38	3	1	2	2	2
(B73 X P39)S5 Sib:2410-B%B	2013	46	4	1	2	2	2
(B73 X P39)S5 Sib:2411-B	2013	51	11	1	4	4	4
(B73 X P39)S5 Sib:2412-B	2013	47	12	1	3	3	3
(B73 X P39)S5 Sib:2413-B	2013	14	11	1	2	2	2
(B73 X P39)S5 Sib:2413-B%B	2013	4	12	1	.	.	.
(B73 X P39)S5 Sib:2414-B	2013	23	5	1	2	2	2
(B73 X P39)S5 Sib:2414-B%B	2013	37	10	1	2	2	2
(B73 X P39)S5 Sib:2415-B	2013	40	5	1	2	2	2
(B73 X P39)S5 Sib:2416-B	2013	33	10	1	3	3	3
(B73 X P39)S5 Sib:2417-B	2013	28	8	1	2	2	2
(B73 X P39)S5 Sib:2419-B	2013	2	3	1	1	1	1
(B73 X P39)S5 Sib:2420-B	2013	5	9	1	.	.	.
(B73 X P39)S5 Sib:2421-B	2013	19	7	1	1	1	1
(B73 X P39)S5 Sib:2422-B	2013	8	4	1	2	2	2
(B73 X P39)S5 Sib:2422-B%B	2013	2	6	1	.	.	.
(B73 X P39)S5 Sib:2424-B	2013	33	4	1	2	2	2
(B73 X P39)S5 Sib:2426-B	2013	21	12	1	2	2	2
(B73 X P39)S5 Sib:2428-B	2013	24	10	1	.	.	.
(B73 X P39)S5 Sib:2429-B	2013	16	10	1	3	3	3
(B73 X P39)S5 Sib:2430-B	2013	53	4	1	2	2	2
(B73 X P39)S5 Sib:2431-B	2013	33	5	1	2	2	2
(B73 X P39)S5 Sib:2433-B%B	2013	53	5	1	3	3	3
(B73 X P39)S5 Sib:2435-B	2013	18	10	1	3	4	3.5
(B73 X P39)S5 Sib:2436-B	2013	18	8	1	2	3	2.5
(B73 X P39)S5 Sib:2437-B	2013	17	10	1	3	3	3
(B73 X P39)S5 Sib:2439-B	2013	6	10	1	.	.	.
(B73 X P39)S5 Sib:2441-B	2013	52	11	1	3	3	3
(B73 X P39)S5 Sib:2442-B	2013	15	8	1	2	2	2
(B73 X P39)S5 Sib:2443-B	2013	40	11	1	4	4	4
(B73 X P39)S5 Sib:2444-B	2013	49	5	1	2	2	2
(B73 X P39)S5 Sib:2445-B	2013	24	4	1	3	3	3
(B73 X P39)S5 Sib:2446-B	2013	14	6	1	3	4	3.5
(B73 X P39)S5 Sib:2447-B	2013	18	7	1	1	1	1
(B73 X P39)S5 Sib:2448-B	2013	33	12	1	2	3	2.5
B14A	2013	40	10	1	4	3	3.5
B14A	2013	20	5	1	4	4	4
B14A	2013	10	6	1	4	4	4
B14A	2013	35	8	1	4	4	4
B14A	2013	8	12	1	4	5	4.5
B14A	2013	7	5	1	.	.	.
B73	2013	52	7	1	2	2	2
B73	2013	26	8	1	2	2	2
B73	2013	17	9	1	2	2	2
B73	2013	38	12	1	2	2	2
B73	2013	30	5	1	3	3	3
B73	2013	47	11	1	3	3	3
HP301	2013	21	11	1	4	3	3.5
HP301	2013	31	5	1	4	4	4
HP301	2013	22	8	1	4	4	4
HP301	2013	50	10	1	4	4	4
HP301	2013	42	12	1	4	4	4
HP301	2013	51	10	1	5	4	4.5
OH43	2013	5	4	1	3	3	3
OH43	2013	10	10	1	4	3	3.5
OH43	2013	3	2	1	4	4	4
OH43	2013	29	10	1	4	4	4
OH43	2013	48	10	1	5	4	4.5
OH43	2013	36	11	1	5	5	5
P39	2013	58	3	1	2	3	2.5
P39	2013	26	2	1	3	3	3
P39	2013	26	4	1	3	3	3
P39	2013	20	7	1	3	3	3
P39	2013	55	7	1	3	3	3
P39	2013	3	6	1	.	.	.
(B73 X Hp301)S5 Sib%B	2014	22	4	1	1	1	1
(B73 X Hp301)S5 Sib%B	2014	27	10	1	1	1	1
(B73 X Hp301)S5 Sib%B	2014	55	9	1	1	2	1.5
(B73 X Hp301)S5 Sib%B	2014	38	2	1	2	2	2
(B73 X Hp301)S5 Sib%B	2014	32	6	1	2	2	2
(B73 X Hp301)S5 Sib%B	2014	12	7	1	2	2	2
(B73 X Hp301)S5 Sib%B	2014	35	7	1	2	2	2
(B73 X Hp301)S5 Sib%B	2014	14	10	1	2	2	2
(B73 X Hp301)S5 Sib%B	2014	16	10	1	2	2	2
(B73 X Hp301)S5 Sib%B	2014	32	11	1	2	2	2
(B73 X Hp301)S5 Sib%B	2014	26	12	1	2	2	2
(B73 X Hp301)S5 Sib%B	2014	56	12	1	2	2	2
(B73 X Hp301)S5 Sib%B	2014	12	5	1	2	3	2.5
(B73 X Hp301)S5 Sib%B	2014	46	8	1	2	3	2.5
(B73 X Hp301)S5 Sib%B	2014	55	10	1	2	3	2.5
(B73 X Hp301)S5 Sib%B	2014	37	2	1	3	3	3
(B73 X Hp301)S5 Sib%B	2014	37	5	1	3	3	3
(B73 X Hp301)S5 Sib%B	2014	15	12	1	3	3	3
(B73 X Hp301)S5 Sib%B	2014	39	12	1	3	3	3
(B73 X Hp301)S5 Sib%B	2014	25	2	1	.	.	.
(B73 X Hp301)S5 Sib%B	2014	24	10	1	.	.	.
(B73 X Hp301)S5 Sib%B	2014	19	12	1	.	.	.
(B73 X Hp301)S5 Sib%B-B	2014	18	10	1	1	1	1
(B73 X Hp301)S5 Sib%B-B	2014	35	8	1	2	2	2
(B73 X Hp301)S5 Sib%B-B	2014	2	3	1	.	.	.
(B73 X Hp301)S5 Sib%B-B	2014	8	12	1	.	.	.
(B73 X Hp301)S5 Sib:2002-B%B	2014	52	8	1	1	2	1.5
(B73 X Hp301)S5 Sib:2005-B	2014	35	3	1	2	2	2
(B73 X Hp301)S5 Sib:2006-B	2014	29	8	1	1	1	1
(B73 X Hp301)S5 Sib:2008-B	2014	10	6	1	2	2	2
(B73 X Hp301)S5 Sib:2009-B-B	2014	2	8	1	.	.	.
(B73 X Hp301)S5 Sib:2010-B	2014	5	11	1	3	4	3.5
(B73 X Hp301)S5 Sib:2011-B	2014	55	7	1	2	3	2.5
(B73 X Hp301)S5 Sib:2012-B	2014	48	9	1	2	2	2
(B73 X Hp301)S5 Sib:2013-B	2014	42	9	1	3	3	3
(B73 X Hp301)S5 Sib:2014-B	2014	43	8	1	1	1	1
(B73 X Hp301)S5 Sib:2015-B	2014	16	8	1	2	3	2.5
(B73 X Hp301)S5 Sib:2017-B	2014	16	12	1	.	.	.
(B73 X Hp301)S5 Sib:2018-B	2014	43	12	1	.	.	.
(B73 X Hp301)S5 Sib:2019-B	2014	4	4	1	2	2	2
(B73 X Hp301)S5 Sib:2020-B	2014	5	5	1	1	1	1
(B73 X Hp301)S5 Sib:2021-B	2014	13	2	1	4	4	4
(B73 X Hp301)S5 Sib:2024-B%B	2014	45	6	1	2	3	2.5
(B73 X Hp301)S5 Sib:2025-B-B	2014	25	7	1	.	.	.
(B73 X Hp301)S5 Sib:2026-B	2014	59	8	1	2	3	2.5
(B73 X Hp301)S5 Sib:2027-B	2014	33	11	1	2	2	2
(B73 X Hp301)S5 Sib:2028-B%B	2014	33	10	1	1	1	1
(B73 X Hp301)S5 Sib:2030-B	2014	29	7	1	1	1	1
(B73 X Hp301)S5 Sib:2031-B	2014	49	3	1	2	.	2
(B73 X Hp301)S5 Sib:2032-B	2014	6	8	1	3	3	3
(B73 X Hp301)S5 Sib:2033-B	2014	3	12	1	3	3	3
(B73 X Hp301)S5 Sib:2034-B%B	2014	16	3	1	.	.	.
(B73 X Hp301)S5 Sib:2036-B	2014	25	4	1	.	.	.
(B73 X Hp301)S5 Sib:2037-B	2014	8	4	1	1	1	1
(B73 X Hp301)S5 Sib:2038-B%B	2014	42	11	1	2	2	2
(B73 X Hp301)S5 Sib:2039-B	2014	27	12	1	1	1	1
(B73 X Hp301)S5 Sib:2040-B-B	2014	7	5	1	2	4	3
(B73 X Hp301)S5 Sib:2041-B	2014	56	3	1	1	1	1
(B73 X Hp301)S5 Sib:2042-B%B	2014	46	7	1	3	4	3.5
(B73 X Hp301)S5 Sib:2043-B	2014	31	9	1	2	1	1.5
(B73 X Hp301)S5 Sib:2045-B-B	2014	31	8	1	1	1	1
(B73 X Hp301)S5 Sib:2046-B	2014	10	2	1	2	2	2
(B73 X Hp301)S5 Sib:2047-B	2014	11	4	1	2	3	2.5
(B73 X Hp301)S5 Sib:2048-B	2014	36	2	1	2	3	2.5
(B73 X Hp301)S5 Sib:2049-B	2014	33	4	1	1	1	1
(B73 X Hp301)S5 Sib:2050-B	2014	13	4	1	2	3	2.5
(B73 X Hp301)S5 Sib:2051-B	2014	55	11	1	2	2	2
(B73 X Hp301)S5 Sib:2052-B%B	2014	12	12	1	1	1	1
(B73 X Hp301)S5 Sib:2053-B	2014	48	7	1	3	4	3.5
(B73 X Hp301)S5 Sib:2055-B%B	2014	32	10	1	.	.	.
(B73 X Hp301)S5 Sib:2056-B-B	2014	30	5	1	1	1	1
(B73 X Hp301)S5 Sib:2057-B%B	2014	45	10	1	1	1	1
(B73 X Hp301)S5 Sib:2058-B	2014	6	12	1	2	2	2
(B73 X Hp301)S5 Sib:2059-B-B	2014	13	9	1	3	3	3
(B73 X Hp301)S5 Sib:2060-B	2014	13	3	1	5	5	5
(B73 X Hp301)S5 Sib:2061-B	2014	53	7	1	3	3	3
(B73 X Hp301)S5 Sib:2062-B%B	2014	44	7	1	1	1	1
(B73 X Hp301)S5 Sib:2063-B%B	2014	34	4	1	1	1	1
(B73 X Hp301)S5 Sib:2064-B-B	2014	4	6	1	2	2	2
(B73 X Hp301)S5 Sib:2066-B%B	2014	31	11	1	2	1	1.5
(B73 X Hp301)S5 Sib:2067-B	2014	32	9	1	2	2	2
(B73 X Hp301)S5 Sib:2068-B	2014	23	6	1	2	2	2
(B73 X Hp301)S5 Sib:2070-B	2014	43	10	1	3	3	3
(B73 X Hp301)S5 Sib:2071-B%B	2014	7	10	1	1	1	1
(B73 X Hp301)S5 Sib:2072-B	2014	39	11	1	1	.	1
(B73 X Hp301)S5 Sib:2073-B-B	2014	49	9	1	4	4	4
(B73 X Hp301)S5 Sib:2074-B	2014	3	2	1	2	2	2
(B73 X Hp301)S5 Sib:2075-B	2014	43	7	1	2	3	2.5
(B73 X Hp301)S5 Sib:2076-B	2014	38	10	1	1	1	1
(B73 X Hp301)S5 Sib:2077-B-B	2014	44	4	1	.	.	.
(B73 X Hp301)S5 Sib:2079-B-B	2014	8	6	1	3	4	3.5
(B73 X Hp301)S5 Sib:2080-B	2014	36	9	1	1	1	1
(B73 X Hp301)S5 Sib:2081-B-B	2014	9	8	1	2	2	2
(B73 X Hp301)S5 Sib:2082-B-B	2014	9	10	1	3	3	3
(B73 X Hp301)S5 Sib:2084-B	2014	18	4	1	1	1	1
(B73 X Hp301)S5 Sib:2085-B	2014	50	12	1	1	1	1
(B73 X Hp301)S5 Sib:2087-B	2014	36	8	1	1	1	1
(B73 X Hp301)S5 Sib:2088-B-B	2014	42	6	1	2	1	1.5
(B73 X Hp301)S5 Sib:2089-B	2014	47	2	1	1	1	1
(B73 X Hp301)S5 Sib:2090-B	2014	35	12	1	2	3	2.5
(B73 X Hp301)S5 Sib:2091-B	2014	23	11	1	.	.	.
(B73 X Hp301)S5 Sib:2092-B	2014	48	6	1	2	3	2.5
(B73 X Hp301)S5 Sib:2093-B	2014	48	3	1	2	3	2.5
(B73 X Hp301)S5 Sib:2097-B%B	2014	7	8	1	.	.	.
(B73 X Hp301)S5 Sib:2098-B%B	2014	39	10	1	2	2	2
(B73 X Hp301)S5 Sib:2101-B	2014	3	7	1	2	2	2
(B73 X Hp301)S5 Sib:2102-B%B	2014	55	2	1	1	1	1
(B73 X Hp301)S5 Sib:2103-B	2014	31	7	1	1	2	1.5
(B73 X Hp301)S5 Sib:2105-B	2014	38	9	1	1	2	1.5
(B73 X Hp301)S5 Sib:2106-B	2014	17	9	1	1	2	1.5
(B73 X Hp301)S5 Sib:2107-B	2014	30	2	1	2	2	2
(B73 X Hp301)S5 Sib:2110-B%B	2014	53	2	1	2	2	2
(B73 X Hp301)S5 Sib:2111-B	2014	32	7	1	1	2	1.5
(B73 X Hp301)S5 Sib:2112-B%B	2014	23	2	1	2	3	2.5
(B73 X Hp301)S5 Sib:2113-B	2014	5	10	1	1	1	1
(B73 X Hp301)S5 Sib:2115-B	2014	54	5	1	2	3	2.5
(B73 X Hp301)S5 Sib:2116-B	2014	4	5	1	2	2	2
(B73 X Hp301)S5 Sib:2117-B-B	2014	29	12	1	1	1	1
(B73 X Hp301)S5 Sib:2118-B	2014	24	2	1	1	1	1
(B73 X Hp301)S5 Sib:2120-B	2014	26	9	1	1	1	1
(B73 X Hp301)S5 Sib:2121-B	2014	47	9	1	1	1	1
(B73 X Hp301)S5 Sib:2124-B	2014	57	10	1	2	2	2
(B73 X Hp301)S5 Sib:2125-B%B	2014	42	2	1	1	1	1
(B73 X Hp301)S5 Sib:2126-B	2014	6	3	1	3	4	3.5
(B73 X Hp301)S5 Sib:2127-B	2014	56	8	1	2	2	2
(B73 X Hp301)S5 Sib:2128-B%B	2014	27	9	1	2	2	2
(B73 X Hp301)S5 Sib:2129-B	2014	37	11	1	1	2	1.5
(B73 X Hp301)S5 Sib:2130-B	2014	51	2	1	2	3	2.5
(B73 X Hp301)S5 Sib:2131-B	2014	45	7	1	1	2	1.5
(B73 X Hp301)S5 Sib:2132-B%B	2014	10	3	1	2	2	2
(B73 X Hp301)S5 Sib:2133-B-B	2014	47	8	1	1	1	1
(B73 X Hp301)S5 Sib:2134-B	2014	40	6	1	2	2	2
(B73 X Hp301)S5 Sib:2137-B%B	2014	23	7	1	2	2	2
(B73 X Hp301)S5 Sib:2138-B	2014	10	5	1	1	1	1
(B73 X Hp301)S5 Sib:2139-B%B	2014	28	8	1	.	.	.
(B73 X Hp301)S5 Sib:2142-B	2014	12	2	1	4	4	4
(B73 X Hp301)S5 Sib:2143-B	2014	31	10	1	1	1	1
(B73 X Hp301)S5 Sib:2144-B	2014	13	11	1	2	3	2.5
(B73 X Hp301)S5 Sib:2145-B	2014	53	12	1	1	2	1.5
(B73 X Hp301)S5 Sib:2146-B	2014	32	2	1	1	1	1
(B73 X Hp301)S5 Sib:2147-B	2014	9	5	1	.	.	.
(B73 X Hp301)S5 Sib:2148-B-B	2014	39	6	1	1	1	1
(B73 X Hp301)S5 Sib:2150-B%B	2014	21	9	1	1	1	1
(B73 X Oh43)S5 Sib%B	2014	19	2	1	1	1	1
(B73 X Oh43)S5 Sib%B	2014	52	2	1	1	1	1
(B73 X Oh43)S5 Sib%B	2014	3	3	1	1	1	1
(B73 X Oh43)S5 Sib%B	2014	45	3	1	1	1	1
(B73 X Oh43)S5 Sib%B	2014	6	4	1	1	1	1
(B73 X Oh43)S5 Sib%B	2014	17	4	1	1	1	1
(B73 X Oh43)S5 Sib%B	2014	19	6	1	1	1	1
(B73 X Oh43)S5 Sib%B	2014	31	6	1	1	1	1
(B73 X Oh43)S5 Sib%B	2014	33	6	1	1	1	1
(B73 X Oh43)S5 Sib%B	2014	36	6	1	1	1	1
(B73 X Oh43)S5 Sib%B	2014	20	7	1	1	1	1
(B73 X Oh43)S5 Sib%B	2014	13	8	1	1	1	1
(B73 X Oh43)S5 Sib%B	2014	21	8	1	1	1	1
(B73 X Oh43)S5 Sib%B	2014	27	8	1	1	1	1
(B73 X Oh43)S5 Sib%B	2014	48	8	1	1	1	1
(B73 X Oh43)S5 Sib%B	2014	58	8	1	1	1	1
(B73 X Oh43)S5 Sib%B	2014	59	10	1	1	1	1
(B73 X Oh43)S5 Sib%B	2014	47	11	1	1	1	1
(B73 X Oh43)S5 Sib%B	2014	59	11	1	1	1	1
(B73 X Oh43)S5 Sib%B	2014	31	12	1	1	1	1
(B73 X Oh43)S5 Sib%B	2014	33	12	1	1	1	1
(B73 X Oh43)S5 Sib%B	2014	47	12	1	1	1	1
(B73 X Oh43)S5 Sib%B	2014	37	4	1	1	2	1.5
(B73 X Oh43)S5 Sib%B	2014	52	12	1	1	2	1.5
(B73 X Oh43)S5 Sib%B	2014	45	2	1	2	2	2
(B73 X Oh43)S5 Sib%B	2014	4	3	1	2	2	2
(B73 X Oh43)S5 Sib%B	2014	12	3	1	2	2	2
(B73 X Oh43)S5 Sib%B	2014	27	4	1	2	2	2
(B73 X Oh43)S5 Sib%B	2014	40	4	1	2	2	2
(B73 X Oh43)S5 Sib%B	2014	40	5	1	2	2	2
(B73 X Oh43)S5 Sib%B	2014	16	6	1	2	2	2
(B73 X Oh43)S5 Sib%B	2014	18	7	1	2	2	2
(B73 X Oh43)S5 Sib%B	2014	30	7	1	2	2	2
(B73 X Oh43)S5 Sib%B	2014	37	9	1	2	2	2
(B73 X Oh43)S5 Sib%B	2014	40	9	1	2	2	2
(B73 X Oh43)S5 Sib%B	2014	58	11	1	2	2	2
(B73 X Oh43)S5 Sib%B	2014	44	12	1	2	2	2
(B73 X Oh43)S5 Sib%B	2014	56	9	1	1	3	2
(B73 X Oh43)S5 Sib%B	2014	15	2	1	2	3	2.5
(B73 X Oh43)S5 Sib%B	2014	41	3	1	2	3	2.5
(B73 X Oh43)S5 Sib%B	2014	50	3	1	2	3	2.5
(B73 X Oh43)S5 Sib%B	2014	52	3	1	2	3	2.5
(B73 X Oh43)S5 Sib%B	2014	21	4	1	2	3	2.5
(B73 X Oh43)S5 Sib%B	2014	44	5	1	2	3	2.5
(B73 X Oh43)S5 Sib%B	2014	27	6	1	2	3	2.5
(B73 X Oh43)S5 Sib%B	2014	58	7	1	2	3	2.5
(B73 X Oh43)S5 Sib%B	2014	11	8	1	2	3	2.5
(B73 X Oh43)S5 Sib%B	2014	19	10	1	2	3	2.5
(B73 X Oh43)S5 Sib%B	2014	40	10	1	2	3	2.5
(B73 X Oh43)S5 Sib%B	2014	35	11	1	2	3	2.5
(B73 X Oh43)S5 Sib%B	2014	43	5	1	3	3	3
(B73 X Oh43)S5 Sib%B	2014	5	12	1	3	3	3
(B73 X Oh43)S5 Sib%B	2014	45	5	1	2	4	3
(B73 X Oh43)S5 Sib%B	2014	50	2	1	3	4	3.5
(B73 X Oh43)S5 Sib%B	2014	58	10	1	3	4	3.5
(B73 X Oh43)S5 Sib%B	2014	14	3	1	4	4	4
(B73 X Oh43)S5 Sib%B	2014	15	3	1	4	4	4
(B73 X Oh43)S5 Sib%B	2014	18	9	1	2	.	2
(B73 X Oh43)S5 Sib%B	2014	16	4	1	.	.	.
(B73 X Oh43)S5 Sib%B	2014	3	5	1	.	.	.
(B73 X Oh43)S5 Sib%B	2014	35	5	1	.	.	.
(B73 X Oh43)S5 Sib%B	2014	2	6	1	.	.	.
(B73 X Oh43)S5 Sib%B	2014	25	6	1	.	.	.
(B73 X Oh43)S5 Sib%B	2014	29	6	1	.	.	.
(B73 X Oh43)S5 Sib%B	2014	16	7	1	.	.	.
(B73 X Oh43)S5 Sib%B	2014	25	8	1	.	.	.
(B73 X Oh43)S5 Sib%B	2014	2	9	1	.	.	.
(B73 X Oh43)S5 Sib%B	2014	2	12	1	.	.	.
(B73 X Oh43)S5 Sib%B	2014	9	12	1	.	.	.
(B73 X Oh43)S5 Sib%B	2014	23	12	1	.	.	.
(B73 X Oh43)S5 Sib%B	2014	24	12	1	.	.	.
(B73 X Oh43)S5 Sib%B	2014	25	12	1	.	.	.
(B73 X Oh43)S5 Sib:2151-B	2014	9	9	1	3	3	3
(B73 X Oh43)S5 Sib:2151-B	2014	15	7	1	4	5	4.5
(B73 X Oh43)S5 Sib:2152-B	2014	17	3	1	.	.	.
(B73 X Oh43)S5 Sib:2152-B	2014	2	11	1	.	.	.
(B73 X Oh43)S5 Sib:2154-B	2014	24	4	1	1	1	1
(B73 X Oh43)S5 Sib:2154-B	2014	11	10	1	1	1	1
(B73 X Oh43)S5 Sib:2155-B	2014	22	7	1	1	2	1.5
(B73 X Oh43)S5 Sib:2155-B	2014	37	8	1	.	.	.
(B73 X Oh43)S5 Sib:2156-B	2014	8	11	1	4	4	4
(B73 X Oh43)S5 Sib:2156-B	2014	51	12	1	4	5	4.5
(B73 X Oh43)S5 Sib:2157-B	2014	44	6	1	4	4	4
(B73 X Oh43)S5 Sib:2157-B	2014	48	5	1	3	5	4
(B73 X Oh43)S5 Sib:2158-B	2014	56	4	1	2	1	1.5
(B73 X Oh43)S5 Sib:2158-B	2014	11	7	1	2	1	1.5
(B73 X Oh43)S5 Sib:2159-B	2014	31	5	1	2	2	2
(B73 X Oh43)S5 Sib:2159-B	2014	51	10	1	2	3	2.5
(B73 X Oh43)S5 Sib:2160-B	2014	3	11	1	1	1	1
(B73 X Oh43)S5 Sib:2160-B	2014	40	2	1	2	2	2
(B73 X Oh43)S5 Sib:2161-B	2014	15	5	1	2	3	2.5
(B73 X Oh43)S5 Sib:2161-B	2014	41	9	1	2	3	2.5
(B73 X Oh43)S5 Sib:2162-B	2014	55	4	1	2	4	3
(B73 X Oh43)S5 Sib:2162-B	2014	7	6	1	4	5	4.5
(B73 X Oh43)S5 Sib:2163-B	2014	19	11	1	1	1	1
(B73 X Oh43)S5 Sib:2163-B	2014	50	5	1	1	2	1.5
(B73 X Oh43)S5 Sib:2164-B	2014	29	5	1	1	1	1
(B73 X Oh43)S5 Sib:2164-B	2014	6	7	1	1	2	1.5
(B73 X Oh43)S5 Sib:2165-B	2014	45	4	1	3	4	3.5
(B73 X Oh43)S5 Sib:2165-B	2014	25	5	1	.	.	.
(B73 X Oh43)S5 Sib:2166-B	2014	49	6	1	1	1	1
(B73 X Oh43)S5 Sib:2166-B	2014	36	11	1	1	1	1
(B73 X Oh43)S5 Sib:2167-B	2014	8	7	1	3	4	3.5
(B73 X Oh43)S5 Sib:2167-B	2014	13	6	1	4	5	4.5
(B73 X Oh43)S5 Sib:2168-B	2014	12	8	1	2	2	2
(B73 X Oh43)S5 Sib:2168-B	2014	57	11	1	3	3	3
(B73 X Oh43)S5 Sib:2169-B	2014	35	4	1	3	4	3.5
(B73 X Oh43)S5 Sib:2169-B	2014	5	7	1	3	4	3.5
(B73 X Oh43)S5 Sib:2170-B%B	2014	23	10	1	1	2	1.5
(B73 X Oh43)S5 Sib:2170-B%B	2014	36	3	1	.	.	.
(B73 X Oh43)S5 Sib:2171-B	2014	3	10	1	2	2	2
(B73 X Oh43)S5 Sib:2171-B	2014	45	11	1	2	2	2
(B73 X Oh43)S5 Sib:2172-B	2014	52	11	1	2	3	2.5
(B73 X Oh43)S5 Sib:2172-B	2014	11	11	1	3	3	3
(B73 X Oh43)S5 Sib:2174-B	2014	41	11	1	3	4	3.5
(B73 X Oh43)S5 Sib:2174-B	2014	8	10	1	4	4	4
(B73 X Oh43)S5 Sib:2175-B	2014	54	4	1	1	2	1.5
(B73 X Oh43)S5 Sib:2175-B	2014	5	4	1	2	2	2
(B73 X Oh43)S5 Sib:2176-B	2014	21	11	1	2	3	2.5
(B73 X Oh43)S5 Sib:2176-B	2014	52	7	1	3	4	3.5
(B73 X Oh43)S5 Sib:2177-B%B	2014	43	3	1	2	3	2.5
(B73 X Oh43)S5 Sib:2177-B%B	2014	48	10	1	2	3	2.5
(B73 X Oh43)S5 Sib:2178-B	2014	34	11	1	1	1	1
(B73 X Oh43)S5 Sib:2178-B	2014	53	11	1	1	1	1
(B73 X Oh43)S5 Sib:2179-B	2014	8	5	1	3	3	3
(B73 X Oh43)S5 Sib:2179-B	2014	28	11	1	.	.	.
(B73 X Oh43)S5 Sib:2180-B	2014	14	4	1	.	.	.
(B73 X Oh43)S5 Sib:2180-B	2014	44	9	1	.	.	.
(B73 X Oh43)S5 Sib:2181-B	2014	21	10	1	1	1	1
(B73 X Oh43)S5 Sib:2181-B	2014	50	10	1	2	2	2
(B73 X Oh43)S5 Sib:2183-B	2014	58	5	1	1	1	1
(B73 X Oh43)S5 Sib:2183-B	2014	51	9	1	1	1	1
(B73 X Oh43)S5 Sib:2184-B	2014	24	11	1	1	2	1.5
(B73 X Oh43)S5 Sib:2184-B	2014	34	12	1	.	.	.
(B73 X Oh43)S5 Sib:2185-B	2014	2	4	1	.	.	.
(B73 X Oh43)S5 Sib:2185-B	2014	28	10	1	.	.	.
(B73 X Oh43)S5 Sib:2186-B	2014	12	4	1	2	3	2.5
(B73 X Oh43)S5 Sib:2186-B	2014	38	8	1	2	3	2.5
(B73 X Oh43)S5 Sib:2187-B	2014	59	2	1	2	2	2
(B73 X Oh43)S5 Sib:2187-B	2014	41	10	1	2	2	2
(B73 X Oh43)S5 Sib:2188-B	2014	41	5	1	1	1	1
(B73 X Oh43)S5 Sib:2188-B	2014	29	11	1	1	1	1
(B73 X Oh43)S5 Sib:2189-B	2014	41	4	1	1	1	1
(B73 X Oh43)S5 Sib:2189-B	2014	37	6	1	1	2	1.5
(B73 X Oh43)S5 Sib:2190-B	2014	30	10	1	1	1	1
(B73 X Oh43)S5 Sib:2190-B	2014	58	12	1	1	1	1
(B73 X Oh43)S5 Sib:2191-B	2014	3	6	1	2	3	2.5
(B73 X Oh43)S5 Sib:2191-B	2014	10	11	1	.	.	.
(B73 X Oh43)S5 Sib:2193-B	2014	43	2	1	2	2	2
(B73 X Oh43)S5 Sib:2193-B	2014	52	4	1	2	3	2.5
(B73 X Oh43)S5 Sib:2194-B	2014	32	3	1	1	1	1
(B73 X Oh43)S5 Sib:2194-B	2014	18	2	1	2	2	2
(B73 X Oh43)S5 Sib:2195-B	2014	23	4	1	1	1	1
(B73 X Oh43)S5 Sib:2195-B	2014	21	12	1	1	1	1
(B73 X Oh43)S5 Sib:2196-B	2014	33	9	1	3	4	3.5
(B73 X Oh43)S5 Sib:2196-B	2014	38	11	1	3	4	3.5
(B73 X Oh43)S5 Sib:2197-B	2014	21	7	1	2	2	2
(B73 X Oh43)S5 Sib:2197-B	2014	34	5	1	2	3	2.5
(B73 X Oh43)S5 Sib:2198-B	2014	22	11	1	1	1	1
(B73 X Oh43)S5 Sib:2198-B	2014	48	11	1	2	3	2.5
(B73 X Oh43)S5 Sib:2200-B-B	2014	40	7	1	2	2	2
(B73 X Oh43)S5 Sib:2200-B-B	2014	9	6	1	.	.	.
(B73 X Oh43)S5 Sib:2201-B	2014	14	6	1	2	2	2
(B73 X Oh43)S5 Sib:2201-B	2014	41	7	1	3	3	3
(B73 X Oh43)S5 Sib:2203-B	2014	33	5	1	2	2	2
(B73 X Oh43)S5 Sib:2203-B	2014	6	11	1	2	3	2.5
(B73 X Oh43)S5 Sib:2204-B	2014	39	5	1	1	1	1
(B73 X Oh43)S5 Sib:2204-B	2014	29	9	1	1	1	1
(B73 X Oh43)S5 Sib:2205-B	2014	54	11	1	1	2	1.5
(B73 X Oh43)S5 Sib:2205-B	2014	9	3	1	3	3	3
(B73 X Oh43)S5 Sib:2207-B%B	2014	34	6	1	1	1	1
(B73 X Oh43)S5 Sib:2207-B%B	2014	12	11	1	2	2	2
(B73 X Oh43)S5 Sib:2208-B	2014	32	5	1	1	1	1
(B73 X Oh43)S5 Sib:2208-B	2014	38	4	1	2	2	2
(B73 X Oh43)S5 Sib:2209-B	2014	49	8	1	2	2	2
(B73 X Oh43)S5 Sib:2209-B	2014	15	6	1	2	3	2.5
(B73 X Oh43)S5 Sib:2210-B	2014	53	6	1	2	3	2.5
(B73 X Oh43)S5 Sib:2210-B	2014	58	6	1	2	3	2.5
(B73 X Oh43)S5 Sib:2211-B	2014	13	5	1	1	1	1
(B73 X Oh43)S5 Sib:2211-B	2014	15	9	1	2	2	2
(B73 X Oh43)S5 Sib:2212-B	2014	53	3	1	3	3	3
(B73 X Oh43)S5 Sib:2212-B	2014	39	7	1	3	3	3
(B73 X Oh43)S5 Sib:2213-B	2014	36	4	1	2	2	2
(B73 X Oh43)S5 Sib:2213-B	2014	55	3	1	2	3	2.5
(B73 X Oh43)S5 Sib:2214-B	2014	15	8	1	1	1	1
(B73 X Oh43)S5 Sib:2214-B	2014	2	10	1	.	.	.
(B73 X Oh43)S5 Sib:2215-B	2014	39	3	1	2	3	2.5
(B73 X Oh43)S5 Sib:2215-B	2014	44	8	1	3	3	3
(B73 X Oh43)S5 Sib:2216-B-B	2014	52	5	1	1	1	1
(B73 X Oh43)S5 Sib:2216-B-B	2014	6	6	1	1	1	1
(B73 X Oh43)S5 Sib:2217-B	2014	46	2	1	2	4	3
(B73 X Oh43)S5 Sib:2217-B	2014	5	6	1	3	4	3.5
(B73 X Oh43)S5 Sib:2218-B	2014	38	5	1	2	3	2.5
(B73 X Oh43)S5 Sib:2218-B	2014	38	7	1	2	3	2.5
(B73 X Oh43)S5 Sib:2219-B	2014	21	6	1	1	1	1
(B73 X Oh43)S5 Sib:2219-B	2014	5	9	1	1	1	1
(B73 X Oh43)S5 Sib:2220-B	2014	4	7	1	2	2	2
(B73 X Oh43)S5 Sib:2220-B	2014	28	7	1	.	.	.
(B73 X Oh43)S5 Sib:2221-B	2014	17	6	1	2	3	2.5
(B73 X Oh43)S5 Sib:2221-B	2014	50	9	1	4	5	4.5
(B73 X Oh43)S5 Sib:2222-B	2014	16	5	1	1	1	1
(B73 X Oh43)S5 Sib:2222-B	2014	58	9	1	1	2	1.5
(B73 X Oh43)S5 Sib:2223-B	2014	26	5	1	2	2	2
(B73 X Oh43)S5 Sib:2223-B	2014	28	5	1	.	.	.
(B73 X Oh43)S5 Sib:2226-B	2014	21	2	1	3	3	3
(B73 X Oh43)S5 Sib:2226-B	2014	42	12	1	3	3	3
(B73 X Oh43)S5 Sib:2227-B	2014	21	5	1	1	1	1
(B73 X Oh43)S5 Sib:2227-B	2014	36	10	1	1	1	1
(B73 X Oh43)S5 Sib:2228-B	2014	28	4	1	2	3	2.5
(B73 X Oh43)S5 Sib:2228-B	2014	17	12	1	.	.	.
(B73 X Oh43)S5 Sib:2229-B	2014	39	2	1	2	4	3
(B73 X Oh43)S5 Sib:2229-B	2014	58	3	1	2	4	3
(B73 X Oh43)S5 Sib:2230-B	2014	47	10	1	1	1	1
(B73 X Oh43)S5 Sib:2230-B	2014	46	12	1	2	3	2.5
(B73 X Oh43)S5 Sib:2231-B	2014	49	7	1	3	3	3
(B73 X Oh43)S5 Sib:2231-B	2014	7	11	1	3	3	3
(B73 X Oh43)S5 Sib:2232-B	2014	56	7	1	1	1	1
(B73 X Oh43)S5 Sib:2232-B	2014	47	3	1	2	1	1.5
(B73 X Oh43)S5 Sib:2233-B	2014	53	9	1	2	3	2.5
(B73 X Oh43)S5 Sib:2233-B	2014	46	11	1	3	4	3.5
(B73 X Oh43)S5 Sib:2234-B	2014	17	8	1	2	2	2
(B73 X Oh43)S5 Sib:2234-B	2014	37	12	1	2	3	2.5
(B73 X Oh43)S5 Sib:2235-B	2014	51	8	1	2	3	2.5
(B73 X Oh43)S5 Sib:2235-B	2014	13	7	1	3	4	3.5
(B73 X Oh43)S5 Sib:2236-B	2014	31	4	1	1	1	1
(B73 X Oh43)S5 Sib:2236-B	2014	51	3	1	2	3	2.5
(B73 X Oh43)S5 Sib:2237-B	2014	27	5	1	1	2	1.5
(B73 X Oh43)S5 Sib:2237-B	2014	9	2	1	2	2	2
(B73 X Oh43)S5 Sib:2238-B	2014	18	6	1	2	3	2.5
(B73 X Oh43)S5 Sib:2238-B	2014	33	7	1	2	3	2.5
(B73 X Oh43)S5 Sib:2239-B	2014	22	3	1	1	1	1
(B73 X Oh43)S5 Sib:2239-B	2014	9	4	1	1	2	1.5
(B73 X Oh43)S5 Sib:2240-B	2014	55	5	1	1	1	1
(B73 X Oh43)S5 Sib:2240-B	2014	24	8	1	1	1	1
(B73 X Oh43)S5 Sib:2241-B	2014	47	7	1	1	1	1
(B73 X Oh43)S5 Sib:2241-B	2014	26	11	1	1	1	1
(B73 X Oh43)S5 Sib:2242-B	2014	59	6	1	3	3	3
(B73 X Oh43)S5 Sib:2242-B	2014	13	10	1	3	3	3
(B73 X Oh43)S5 Sib:2243-B	2014	48	4	1	1	1	1
(B73 X Oh43)S5 Sib:2243-B	2014	56	11	1	1	1	1
(B73 X Oh43)S5 Sib:2244-B	2014	58	4	1	2	3	2.5
(B73 X Oh43)S5 Sib:2244-B	2014	42	8	1	2	3	2.5
(B73 X Oh43)S5 Sib:2245-B	2014	53	4	1	2	2	2
(B73 X Oh43)S5 Sib:2245-B	2014	59	5	1	2	2	2
(B73 X Oh43)S5 Sib:2246-B	2014	23	3	1	3	4	3.5
(B73 X Oh43)S5 Sib:2246-B	2014	26	8	1	3	4	3.5
(B73 X Oh43)S5 Sib:2247-B	2014	31	2	1	2	3	2.5
(B73 X Oh43)S5 Sib:2247-B	2014	20	12	1	2	3	2.5
(B73 X Oh43)S5 Sib:2248-B	2014	4	2	1	2	3	2.5
(B73 X Oh43)S5 Sib:2248-B	2014	5	2	1	3	3	3
(B73 X Oh43)S5 Sib:2249-B	2014	50	8	1	2	2	2
(B73 X Oh43)S5 Sib:2249-B	2014	15	11	1	3	3	3
(B73 X Oh43)S5 Sib:2250-B	2014	56	5	1	2	3	2.5
(B73 X Oh43)S5 Sib:2250-B	2014	3	4	1	3	3	3
(B73 X Oh43)S5 Sib:2251-B	2014	18	8	1	1	1	1
(B73 X Oh43)S5 Sib:2251-B	2014	49	5	1	2	1	1.5
(B73 X Oh43)S5 Sib:2252-B	2014	49	12	1	1	2	1.5
(B73 X Oh43)S5 Sib:2252-B	2014	46	9	1	1	.	1
(B73 X Oh43)S5 Sib:2253-B	2014	43	9	1	1	1	1
(B73 X Oh43)S5 Sib:2253-B	2014	57	7	1	2	1	1.5
(B73 X Oh43)S5 Sib:2254-B	2014	52	6	1	2	2	2
(B73 X Oh43)S5 Sib:2254-B	2014	55	8	1	2	2	2
(B73 X Oh43)S5 Sib:2255-B%B	2014	40	11	1	2	3	2.5
(B73 X Oh43)S5 Sib:2255-B%B	2014	25	11	1	.	.	.
(B73 X Oh43)S5 Sib:2256-B	2014	20	2	1	1	1	1
(B73 X Oh43)S5 Sib:2256-B	2014	55	6	1	2	3	2.5
(B73 X Oh43)S5 Sib:2257-B	2014	51	11	1	1	1	1
(B73 X Oh43)S5 Sib:2257-B	2014	57	2	1	2	3	2.5
(B73 X Oh43)S5 Sib:2258-B	2014	53	5	1	1	1	1
(B73 X Oh43)S5 Sib:2258-B	2014	37	10	1	1	1	1
(B73 X Oh43)S5 Sib:2259-B	2014	19	9	1	2	3	2.5
(B73 X Oh43)S5 Sib:2259-B	2014	12	9	1	4	4	4
(B73 X Oh43)S5 Sib:2260-B	2014	49	4	1	3	4	3.5
(B73 X Oh43)S5 Sib:2260-B	2014	10	12	1	.	.	.
(B73 X Oh43)S5 Sib:2261-B	2014	8	3	1	2	3	2.5
(B73 X Oh43)S5 Sib:2261-B	2014	11	5	1	3	3	3
(B73 X Oh43)S5 Sib:2262-B	2014	30	11	1	1	3	2
(B73 X Oh43)S5 Sib:2262-B	2014	4	12	1	3	3	3
(B73 X Oh43)S5 Sib:2263-B	2014	14	2	1	1	1	1
(B73 X Oh43)S5 Sib:2263-B	2014	55	12	1	1	1	1
(B73 X Oh43)S5 Sib:2264-B	2014	26	3	1	1	1	1
(B73 X Oh43)S5 Sib:2264-B	2014	53	8	1	2	2	2
(B73 X Oh43)S5 Sib:2265-B	2014	50	7	1	3	3	3
(B73 X Oh43)S5 Sib:2265-B	2014	7	2	1	3	4	3.5
(B73 X Oh43)S5 Sib:2266-B	2014	52	10	1	2	3	2.5
(B73 X Oh43)S5 Sib:2266-B	2014	39	4	1	3	3	3
(B73 X Oh43)S5 Sib:2267-B%B	2014	41	8	1	3	3	3
(B73 X Oh43)S5 Sib:2267-B%B	2014	26	10	1	2	4	3
(B73 X Oh43)S5 Sib:2269-B	2014	30	6	1	1	1	1
(B73 X Oh43)S5 Sib:2269-B	2014	4	10	1	1	1	1
(B73 X Oh43)S5 Sib:2270-B	2014	9	7	1	1	1	1
(B73 X Oh43)S5 Sib:2270-B	2014	59	7	1	1	1	1
(B73 X Oh43)S5 Sib:2271-B-B	2014	50	6	1	1	1	1
(B73 X Oh43)S5 Sib:2271-B-B	2014	22	9	1	1	1	1
(B73 X Oh43)S5 Sib:2272-B	2014	48	2	1	2	2	2
(B73 X Oh43)S5 Sib:2272-B	2014	13	12	1	3	3	3
(B73 X Oh43)S5 Sib:2273-B	2014	30	3	1	2	2	2
(B73 X Oh43)S5 Sib:2273-B	2014	2	2	1	2	3	2.5
(B73 X Oh43)S5 Sib:2274-B	2014	34	9	1	1	2	1.5
(B73 X Oh43)S5 Sib:2274-B	2014	42	10	1	2	3	2.5
(B73 X Oh43)S5 Sib:2275-B	2014	36	5	1	2	3	2.5
(B73 X Oh43)S5 Sib:2275-B	2014	8	2	1	3	4	3.5
(B73 X Oh43)S5 Sib:2276-B	2014	40	3	1	1	1	1
(B73 X Oh43)S5 Sib:2276-B	2014	25	9	1	.	.	.
(B73 X Oh43)S5 Sib:2277-B	2014	22	12	1	1	2	1.5
(B73 X Oh43)S5 Sib:2277-B	2014	38	12	1	3	3	3
(B73 X Oh43)S5 Sib:2278-B	2014	22	8	1	2	2	2
(B73 X Oh43)S5 Sib:2278-B	2014	29	4	1	2	3	2.5
(B73 X Oh43)S5 Sib:2279-B	2014	19	3	1	2	1	1.5
(B73 X Oh43)S5 Sib:2279-B	2014	10	7	1	2	2	2
(B73 X Oh43)S5 Sib:2281-B	2014	34	2	1	2	3	2.5
(B73 X Oh43)S5 Sib:2281-B	2014	44	3	1	2	3	2.5
(B73 X Oh43)S5 Sib:2282-B	2014	35	2	1	1	1	1
(B73 X Oh43)S5 Sib:2282-B	2014	36	12	1	1	2	1.5
(B73 X Oh43)S5 Sib:2283-B	2014	16	9	1	2	2	2
(B73 X Oh43)S5 Sib:2283-B	2014	54	12	1	2	3	2.5
(B73 X Oh43)S5 Sib:2284-B	2014	41	6	1	.	.	.
(B73 X Oh43)S5 Sib:2284-B	2014	36	7	1	.	.	.
(B73 X Oh43)S5 Sib:2285-B	2014	44	2	1	3	3	3
(B73 X Oh43)S5 Sib:2285-B	2014	28	3	1	.	.	.
(B73 X Oh43)S5 Sib:2286-B	2014	32	4	1	2	3	2.5
(B73 X Oh43)S5 Sib:2286-B	2014	7	3	1	5	6	5.5
(B73 X Oh43)S5 Sib:2287-B	2014	20	8	1	2	3	2.5
(B73 X Oh43)S5 Sib:2287-B	2014	59	3	1	2	4	3
(B73 X Oh43)S5 Sib:2288-B	2014	47	4	1	2	2	2
(B73 X Oh43)S5 Sib:2288-B	2014	28	12	1	.	.	.
(B73 X Oh43)S5 Sib:2289-B	2014	40	12	1	3	3	3
(B73 X Oh43)S5 Sib:2289-B	2014	52	9	1	3	4	3.5
(B73 X Oh43)S5 Sib:2290-B	2014	54	3	1	1	1	1
(B73 X Oh43)S5 Sib:2290-B	2014	46	10	1	1	1	1
(B73 X Oh43)S5 Sib:2291-B	2014	34	8	1	2	3	2.5
(B73 X Oh43)S5 Sib:2291-B	2014	11	9	1	3	3	3
(B73 X Oh43)S5 Sib:2292-B	2014	23	5	1	1	1	1
(B73 X Oh43)S5 Sib:2292-B	2014	24	7	1	1	1	1
(B73 X Oh43)S5 Sib:2293-B-B	2014	54	9	1	1	1	1
(B73 X Oh43)S5 Sib:2293-B-B	2014	7	7	1	2	3	2.5
(B73 X Oh43)S5 Sib:2294-B	2014	23	9	1	3	4	3.5
(B73 X Oh43)S5 Sib:2294-B	2014	42	3	1	4	4	4
(B73 X Oh43)S5 Sib:2295-B	2014	16	2	1	2	2	2
(B73 X Oh43)S5 Sib:2295-B	2014	15	4	1	4	4	4
(B73 X Oh43)S5 Sib:2296-B	2014	6	2	1	4	5	4.5
(B73 X Oh43)S5 Sib:2296-B	2014	59	9	1	4	5	4.5
(B73 X Oh43)S5 Sib:2298-B	2014	33	2	1	1	1	1
(B73 X Oh43)S5 Sib:2298-B	2014	17	5	1	.	.	.
(B73 X Oh43)S5 Sib:2299-B	2014	34	7	1	1	1	1
(B73 X Oh43)S5 Sib:2299-B	2014	33	8	1	1	1	1
(B73 X Oh43)S5 Sib:2300-B%B	2014	39	9	1	3	3	3
(B73 X Oh43)S5 Sib:2300-B%B	2014	51	6	1	4	4	4
(B73 X P39)S5 Sib%B	2014	44	10	1	1	1	1
(B73 X P39)S5 Sib%B	2014	42	4	1	2	3	2.5
(B73 X P39)S5 Sib%B	2014	56	6	1	2	3	2.5
(B73 X P39)S5 Sib%B	2014	39	8	1	2	3	2.5
(B73 X P39)S5 Sib%B	2014	30	4	1	2	4	3
(B73 X P39)S5 Sib%B	2014	57	12	1	2	4	3
(B73 X P39)S5 Sib%B	2014	57	4	1	.	.	.
(B73 X P39)S5 Sib%B	2014	7	12	1	.	.	.
(B73 X P39)S5 Sib:2301-B	2014	43	4	1	1	1	1
(B73 X P39)S5 Sib:2303-B	2014	32	12	1	1	1	1
(B73 X P39)S5 Sib:2305-B%B	2014	11	12	1	2	3	2.5
(B73 X P39)S5 Sib:2307-B-B	2014	24	9	1	.	.	.
(B73 X P39)S5 Sib:2308-B	2014	37	7	1	1	1	1
(B73 X P39)S5 Sib:2309-B%B	2014	57	3	1	2	4	3
(B73 X P39)S5 Sib:2310-B	2014	47	6	1	3	4	3.5
(B73 X P39)S5 Sib:2314-B	2014	18	12	1	1	2	1.5
(B73 X P39)S5 Sib:2315-B%B	2014	14	9	1	2	3	2.5
(B73 X P39)S5 Sib:2317-B	2014	50	11	1	.	.	.
(B73 X P39)S5 Sib:2318-B-B	2014	10	10	1	2	2	2
(B73 X P39)S5 Sib:2319-B	2014	8	8	1	3	4	3.5
(B73 X P39)S5 Sib:2321-B	2014	32	8	1	.	.	.
(B73 X P39)S5 Sib:2322-B	2014	53	10	1	.	.	.
(B73 X P39)S5 Sib:2323-B	2014	57	5	1	1	1	1
(B73 X P39)S5 Sib:2324-B-B	2014	10	9	1	2	2	2
(B73 X P39)S5 Sib:2326-B	2014	29	2	1	1	2	1.5
(B73 X P39)S5 Sib:2327-B	2014	18	3	1	1	1	1
(B73 X P39)S5 Sib:2328-B	2014	10	4	1	2	3	2.5
(B73 X P39)S5 Sib:2330-B	2014	49	2	1	1	2	1.5
(B73 X P39)S5 Sib:2334-B	2014	18	5	1	1	1	1
(B73 X P39)S5 Sib:2335-B	2014	37	3	1	.	2	2
(B73 X P39)S5 Sib:2337-B	2014	3	9	1	.	.	.
(B73 X P39)S5 Sib:2338-B%B	2014	22	5	1	.	.	.
(B73 X P39)S5 Sib:2339-B	2014	6	5	1	3	4	3.5
(B73 X P39)S5 Sib:2341-B	2014	11	2	1	2	3	2.5
(B73 X P39)S5 Sib:2342-B	2014	45	8	1	2	2	2
(B73 X P39)S5 Sib:2344-B	2014	19	8	1	2	3	2.5
(B73 X P39)S5 Sib:2345-B	2014	20	9	1	2	2	2
(B73 X P39)S5 Sib:2346-B	2014	10	8	1	2	2	2
(B73 X P39)S5 Sib:2347-B	2014	6	10	1	.	.	.
(B73 X P39)S5 Sib:2348-B%B	2014	54	6	1	1	1	1
(B73 X P39)S5 Sib:2351-B-B	2014	30	9	1	1	1	1
(B73 X P39)S5 Sib:2353-B	2014	4	9	1	.	.	.
(B73 X P39)S5 Sib:2354-B	2014	27	3	1	1	1	1
(B73 X P39)S5 Sib:2355-B	2014	26	7	1	1	1	1
(B73 X P39)S5 Sib:2356-B	2014	18	11	1	1	2	1.5
(B73 X P39)S5 Sib:2357-B-B	2014	23	8	1	1	2	1.5
(B73 X P39)S5 Sib:2358-B-B	2014	48	12	1	2	2	2
(B73 X P39)S5 Sib:2360-B-B	2014	47	5	1	1	2	1.5
(B73 X P39)S5 Sib:2361-B-B	2014	46	6	1	.	.	.
(B73 X P39)S5 Sib:2362-B	2014	28	2	1	.	.	.
(B73 X P39)S5 Sib:2363-B	2014	20	6	1	1	1	1
(B73 X P39)S5 Sib:2364-B	2014	22	2	1	1	1	1
(B73 X P39)S5 Sib:2365-B	2014	17	7	1	1	1	1
(B73 X P39)S5 Sib:2366-B	2014	28	6	1	.	.	.
(B73 X P39)S5 Sib:2367-B	2014	54	8	1	1	2	1.5
(B73 X P39)S5 Sib:2368-B	2014	49	11	1	2	3	2.5
(B73 X P39)S5 Sib:2369-B	2014	35	6	1	1	2	1.5
(B73 X P39)S5 Sib:2370-B%B	2014	57	6	1	2	3	2.5
(B73 X P39)S5 Sib:2371-B	2014	44	11	1	1	1	1
(B73 X P39)S5 Sib:2372-B	2014	25	10	1	.	.	.
(B73 X P39)S5 Sib:2373-B	2014	26	4	1	1	2	1.5
(B73 X P39)S5 Sib:2374-B	2014	14	5	1	3	4	3.5
(B73 X P39)S5 Sib:2375-B	2014	29	10	1	1	1	1
(B73 X P39)S5 Sib:2376-B	2014	33	3	1	1	1	1
(B73 X P39)S5 Sib:2377-B	2014	50	4	1	2	3	2.5
(B73 X P39)S5 Sib:2378-B	2014	14	8	1	2	2	2
(B73 X P39)S5 Sib:2379-B	2014	4	11	1	1	2	1.5
(B73 X P39)S5 Sib:2380-B	2014	17	2	1	2	3	2.5
(B73 X P39)S5 Sib:2381-B	2014	59	12	1	1	1	1
(B73 X P39)S5 Sib:2382-B	2014	2	5	1	.	.	.
(B73 X P39)S5 Sib:2383-B	2014	40	8	1	1	1	1
(B73 X P39)S5 Sib:2384-B	2014	26	6	1	1	2	1.5
(B73 X P39)S5 Sib:2386-B	2014	25	3	1	.	.	.
(B73 X P39)S5 Sib:2387-B	2014	4	8	1	2	3	2.5
(B73 X P39)S5 Sib:2388-B	2014	24	3	1	.	.	.
(B73 X P39)S5 Sib:2389-B	2014	27	11	1	1	1	1
(B73 X P39)S5 Sib:2390-B	2014	22	6	1	2	2	2
(B73 X P39)S5 Sib:2391-B%B	2014	17	10	1	1	1	1
(B73 X P39)S5 Sib:2392-B	2014	12	6	1	3	4	3.5
(B73 X P39)S5 Sib:2393-B%B	2014	20	4	1	1	1	1
(B73 X P39)S5 Sib:2394-B-B	2014	20	10	1	1	1	1
(B73 X P39)S5 Sib:2396-B-B	2014	29	3	1	.	.	.
(B73 X P39)S5 Sib:2397-B	2014	20	11	1	1	1	1
(B73 X P39)S5 Sib:2398-B	2014	56	10	1	1	2	1.5
(B73 X P39)S5 Sib:2399-B	2014	24	5	1	1	1	1
(B73 X P39)S5 Sib:2400-B	2014	26	2	1	1	1	1
(B73 X P39)S5 Sib:2401-B%B	2014	30	12	1	1	1	1
(B73 X P39)S5 Sib:2403-B%B	2014	54	10	1	2	3	2.5
(B73 X P39)S5 Sib:2404-B%B	2014	7	9	1	3	3	3
(B73 X P39)S5 Sib:2405-B	2014	7	4	1	2	4	3
(B73 X P39)S5 Sib:2406-B	2014	19	7	1	2	3	2.5
(B73 X P39)S5 Sib:2407-B	2014	5	8	1	1	2	1.5
(B73 X P39)S5 Sib:2408-B%B-B	2014	58	2	1	1	1	1
(B73 X P39)S5 Sib:2409-B	2014	17	11	1	.	3	3
(B73 X P39)S5 Sib:2410-B%B	2014	57	9	1	1	1	1
(B73 X P39)S5 Sib:2411-B	2014	51	7	1	1	3	2
(B73 X P39)S5 Sib:2412-B	2014	14	7	1	.	.	.
(B73 X P39)S5 Sib:2413-B%B	2014	45	9	1	1	1	1
(B73 X P39)S5 Sib:2414-B%B-B	2014	42	5	1	2	3	2.5
(B73 X P39)S5 Sib:2415-B	2014	51	4	1	1	1	1
(B73 X P39)S5 Sib:2416-B	2014	2	7	1	1	1	1
(B73 X P39)S5 Sib:2417-B	2014	12	10	1	1	2	1.5
(B73 X P39)S5 Sib:2419-B	2014	9	11	1	.	.	.
(B73 X P39)S5 Sib:2420-B	2014	46	3	1	2	2	2
(B73 X P39)S5 Sib:2421-B	2014	45	12	1	.	.	.
(B73 X P39)S5 Sib:2422-B%B	2014	20	5	1	1	1	1
(B73 X P39)S5 Sib:2424-B	2014	43	6	1	2	2	2
(B73 X P39)S5 Sib:2426-B	2014	41	2	1	2	2	2
(B73 X P39)S5 Sib:2428-B	2014	34	3	1	2	3	2.5
(B73 X P39)S5 Sib:2429-B	2014	42	7	1	2	2	2
(B73 X P39)S5 Sib:2430-B	2014	5	3	1	1	3	2
(B73 X P39)S5 Sib:2431-B	2014	56	2	1	1	3	2
(B73 X P39)S5 Sib:2433-B%B	2014	21	3	1	1	2	1.5
(B73 X P39)S5 Sib:2435-B	2014	34	10	1	.	.	.
(B73 X P39)S5 Sib:2436-B-B	2014	24	6	1	1	1	1
(B73 X P39)S5 Sib:2437-B	2014	15	10	1	1	1	1
(B73 X P39)S5 Sib:2439-B	2014	35	10	1	2	3	2.5
(B73 X P39)S5 Sib:2441-B	2014	51	5	1	2	3	2.5
(B73 X P39)S5 Sib:2442-B	2014	14	11	1	1	1	1
(B73 X P39)S5 Sib:2443-B	2014	59	4	1	2	4	3
(B73 X P39)S5 Sib:2444-B-B	2014	31	3	1	2	2	2
(B73 X P39)S5 Sib:2445-B	2014	6	9	1	.	.	.
(B73 X P39)S5 Sib:2447-B	2014	28	9	1	.	.	.
(B73 X P39)S5 Sib:2448-B	2014	20	3	1	1	2	1.5
B14A	2014	19	5	1	2	2	2
B14A	2014	19	4	1	2	3	2.5
B14A	2014	46	4	1	2	3	2.5
B14A	2014	27	7	1	2	3	2.5
B14A	2014	30	8	1	2	3	2.5
B14A	2014	43	11	1	2	3	2.5
B14A	2014	41	12	1	2	3	2.5
B14A	2014	27	2	1	3	3	3
B14A	2014	54	2	1	3	3	3
B14A	2014	11	3	1	3	3	3
B14A	2014	38	3	1	3	3	3
B14A	2014	46	5	1	3	3	3
B14A	2014	3	8	1	3	3	3
B14A	2014	35	9	1	3	3	3
B14A	2014	22	10	1	3	3	3
B14A	2014	38	6	1	3	4	3.5
B14A	2014	54	7	1	3	4	3.5
B14A	2014	57	8	1	3	4	3.5
B14A	2014	49	10	1	3	4	3.5
B14A	2014	11	6	1	4	4	4
B14A	2014	8	9	1	4	4	4
B14A	2014	16	11	1	4	4	4
B14A	2014	14	12	1	4	4	4
Z022E0001	2012	58	87	1	5	.	.
Z022E0002	2012	59	87	1	1	.	.
Z022E0003	2012	60	87	1	3	.	.
Z022E0004	2012	61	87	1	1	.	.
Z022E0005	2012	62	87	1	3	.	.
Z022E0006	2012	63	87	1	6	.	.
Z022E0007	2012	64	87	1	8	.	.
Z022E0008	2012	65	87	1	1	.	.
Z022E0009	2012	66	87	1	5	.	.
B73	2012	67	87	1	2	.	.
Z022E0010	2012	68	87	1	1	.	.
Z022E0011	2012	69	87	1	2	.	.
Z022E0012	2012	70	87	1	6	.	.
Z022E0013	2012	71	87	1	1	.	.
Z022E0014	2012	72	87	1	1	.	.
Z022E0015	2012	73	87	1	2	.	.
Z022E0016	2012	74	87	1	1	.	.
Z022E0017	2012	75	87	1	3	.	.
Z022E0018	2012	76	87	1	2	.	.
OH43	2012	77	87	1	2	.	.
Z022E0019	2012	78	87	1	7	.	.
Z022E0020	2012	79	87	1	5	.	.
Z022E0021	2012	80	87	1	2	.	.
Z022E0023	2012	81	87	1	7	.	.
Z022E0025	2012	82	87	1	6	.	.
Z022E0027	2012	82	88	1	1	.	.
Z022E0028	2012	81	88	1	5	.	.
Z022E0029	2012	80	88	1	3	.	.
Z022E0030	2012	79	88	1	1	.	.
A632	2012	78	88	1	7	.	.
Z022E0031	2012	77	88	1	4	.	.
Z022E0032	2012	76	88	1	3	.	.
Z022E0033	2012	75	88	1	1	.	.
Z022E0034	2012	74	88	1	2	.	.
Z022E0035	2012	73	88	1	1	.	.
Z022E0036	2012	72	88	1	5	.	.
Z022E0037	2012	71	88	1	2	.	.
Z022E0038	2012	70	88	1	3	.	.
Z022E0039	2012	69	88	1	2	.	.
B73	2012	68	88	1	2	.	.
Z022E0040	2012	67	88	1	1	.	.
Z022E0041	2012	66	88	1	2	.	.
Z022E0042	2012	65	88	1	1	.	.
Z022E0043	2012	64	88	1	4	.	.
Z022E0046	2012	63	88	1	2	.	.
Z022E0047	2012	62	88	1	1	.	.
Z022E0048	2012	61	88	1	1	.	.
Z022E0049	2012	60	88	1	6	.	.
Z022E0050	2012	59	88	1	5	.	.
OH43	2012	58	88	1	5	.	.
Z022E0051	2012	57	88	1	3	.	.
Z022E0052	2012	56	88	1	5	.	.
Z022E0053	2012	55	88	1	1	.	.
Z022E0054	2012	54	88	1	2	.	.
Z022E0056	2012	53	88	1	2	.	.
Z022E0057	2012	52	88	1	3	.	.
Z022E0058	2012	51	88	1	1	.	.
Z022E0059	2012	50	88	1	2	.	.
Z022E0061	2012	49	88	1	2	.	.
A632	2012	49	89	1	6	.	.
Z022E0062	2012	50	89	1	3	.	.
Z022E0063	2012	51	89	1	3	.	.
Z022E0064	2012	52	89	1	4	.	.
Z022E0065	2012	53	89	1	3	.	.
Z022E0066	2012	54	89	1	2	.	.
Z022E0067	2012	55	89	1	3	.	.
Z022E0068	2012	56	89	1	1	.	.
Z022E0069	2012	57	89	1	3	.	.
Z022E0070	2012	58	89	1	5	.	.
B73	2012	59	89	1	3	.	.
Z022E0071	2012	60	89	1	6	.	.
Z022E0072	2012	61	89	1	4	.	.
Z022E0073	2012	62	89	1	1	.	.
Z022E0074	2012	63	89	1	2	.	.
Z022E0075	2012	64	89	1	8	.	.
Z022E0076	2012	65	89	1	3	.	.
Z022E0077	2012	66	89	1	5	.	.
Z022E0078	2012	67	89	1	1	.	.
Z022E0079	2012	68	89	1	6	.	.
OH43	2012	69	89	1	4	.	.
Z022E0080	2012	70	89	1	6	.	.
Z022E0081	2012	71	89	1	1	.	.
Z022E0082	2012	72	89	1	1	.	.
Z022E0083	2012	73	89	1	4	.	.
Z022E0084	2012	74	89	1	1	.	.
Z022E0085	2012	75	89	1	2	.	.
Z022E0086	2012	76	89	1	1	.	.
Z022E0087	2012	77	89	1	3	.	.
Z022E0088	2012	78	89	1	5	.	.
A632	2012	79	89	1	4	.	.
Z022E0089	2012	80	89	1	4	.	.
Z022E0090	2012	81	89	1	2	.	.
Z022E0091	2012	82	89	1	2	.	.
Z022E0092	2012	74	90	1	3	.	.
Z022E0093	2012	73	90	1	1	.	.
Z022E0094	2012	72	90	1	1	.	.
Z022E0095	2012	71	90	1	1	.	.
Z022E0096	2012	70	90	1	1	.	.
Z022E0097	2012	69	90	1	1	.	.
B73	2012	68	90	1	2	.	.
Z022E0098	2012	67	90	1	4	.	.
Z022E0099	2012	66	90	1	3	.	.
Z022E0100	2012	65	90	1	5	.	.
Z022E0101	2012	64	90	1	7	.	.
Z022E0102	2012	63	90	1	4	.	.
Z022E0103	2012	62	90	1	4	.	.
Z022E0104	2012	61	90	1	3	.	.
Z022E0105	2012	60	90	1	2	.	.
Z022E0106	2012	59	90	1	4	.	.
OH43	2012	58	90	1	3	.	.
Z022E0107	2012	57	90	1	1	.	.
Z022E0108	2012	56	90	1	1	.	.
Z022E0109	2012	55	90	1	4	.	.
Z022E0110	2012	54	90	1	3	.	.
Z022E0111	2012	53	90	1	2	.	.
Z022E0112	2012	52	90	1	1	.	.
Z022E0113	2012	51	90	1	6	.	.
Z022E0114	2012	50	90	1	2	.	.
Z022E0115	2012	49	90	1	3	.	.
A632	2012	49	91	1	4	.	.
Z022E0116	2012	50	91	1	5	.	.
Z022E0117	2012	51	91	1	3	.	.
Z022E0118	2012	52	91	1	1	.	.
Z022E0119	2012	53	91	1	2	.	.
Z022E0120	2012	54	91	1	4	.	.
Z022E0121	2012	55	91	1	3	.	.
Z022E0122	2012	56	91	1	2	.	.
Z022E0123	2012	57	91	1	1	.	.
Z022E0124	2012	58	91	1	2	.	.
B73	2012	59	91	1	2	.	.
Z022E0125	2012	60	91	1	1	.	.
Z022E0126	2012	61	91	1	1	.	.
Z022E0127	2012	62	91	1	2	.	.
Z022E0128	2012	63	91	1	3	.	.
Z022E0129	2012	64	91	1	5	.	.
Z022E0130	2012	65	91	1	2	.	.
Z022E0131	2012	66	91	1	4	.	.
Z022E0132	2012	67	91	1	4	.	.
Z022E0133	2012	68	91	1	2	.	.
OH43	2012	69	91	1	3	.	.
Z022E0134	2012	70	91	1	7	.	.
Z022E0135	2012	71	91	1	6	.	.
Z022E0136	2012	72	91	1	2	.	.
Z022E0137	2012	73	91	1	3	.	.
Z022E0138	2012	74	91	1	2	.	.
Z022E0139	2012	74	92	1	3	.	.
Z022E0140	2012	73	92	1	7	.	.
Z022E0141	2012	72	92	1	6	.	.
Z022E0142	2012	71	92	1	3	.	.
A632	2012	70	92	1	4	.	.
Z022E0143	2012	69	92	1	5	.	.
Z022E0145	2012	68	92	1	1	.	.
Z022E0146	2012	67	92	1	4	.	.
Z022E0147	2012	66	92	1	1	.	.
Z022E0148	2012	65	92	1	4	.	.
Z022E0149	2012	64	92	1	5	.	.
Z022E0150	2012	63	92	1	2	.	.
Z022E0151	2012	62	92	1	5	.	.
Z022E0153	2012	61	92	1	1	.	.
B73	2012	60	92	1	2	.	.
Z022E0154	2012	59	92	1	1	.	.
Z022E0155	2012	58	92	1	6	.	.
Z022E0156	2012	57	92	1	5	.	.
Z022E0157	2012	56	92	1	7	.	.
Z022E0158	2012	55	92	1	2	.	.
Z022E0159	2012	54	92	1	6	.	.
Z022E0160	2012	53	92	1	7	.	.
Z022E0161	2012	52	92	1	1	.	.
Z022E0162	2012	51	92	1	4	.	.
OH43	2012	50	92	1	3	.	.
Z022E0163	2012	49	92	1	1	.	.
Z022E0164	2012	49	93	1	4	.	.
Z022E0165	2012	50	93	1	2	.	.
Z022E0166	2012	51	93	1	3	.	.
Z022E0167	2012	52	93	1	4	.	.
Z022E0168	2012	53	93	1	6	.	.
Z022E0169	2012	54	93	1	5	.	.
Z022E0170	2012	55	93	1	4	.	.
Z022E0171	2012	56	93	1	4	.	.
A632	2012	57	93	1	5	.	.
Z022E0172	2012	58	93	1	1	.	.
Z022E0173	2012	59	93	1	3	.	.
Z022E0174	2012	60	93	1	4	.	.
Z022E0175	2012	61	93	1	3	.	.
Z022E0176	2012	62	93	1	4	.	.
Z022E0177	2012	63	93	1	4	.	.
Z022E0178	2012	64	93	1	2	.	.
Z022E0179	2012	65	93	1	2	.	.
Z022E0180	2012	66	93	1	1	.	.
B73	2012	67	93	1	2	.	.
Z022E0181	2012	68	93	1	3	.	.
Z022E0182	2012	69	93	1	2	.	.
Z022E0183	2012	70	93	1	4	.	.
Z022E0184	2012	71	93	1	5	.	.
Z022E0185	2012	72	93	1	2	.	.
Z022E0186	2012	73	93	1	4	.	.
Z022E0187	2012	74	93	1	3	.	.
Z022E0188	2012	74	94	1	1	.	.
Z022E0189	2012	73	94	1	2	.	.
OH43	2012	72	94	1	4	.	.
Z022E0190	2012	71	94	1	4	.	.
Z022E0191	2012	70	94	1	1	.	.
Z022E0192	2012	69	94	1	3	.	.
Z022E0193	2012	68	94	1	2	.	.
Z022E0194	2012	67	94	1	1	.	.
Z022E0195	2012	66	94	1	4	.	.
Z022E0196	2012	65	94	1	5	.	.
Z022E0197	2012	64	94	1	6	.	.
Z022E0198	2012	63	94	1	2	.	.
A632	2012	62	94	1	6	.	.
Z022E0199	2012	61	94	1	2	.	.
Z022E0200	2012	60	94	1	5	.	.
Z022E0207	2012	59	94	1	1	.	.
Z022E0215	2012	58	94	1	3	.	.
Z022E0219	2012	57	94	1	2	.	.
Z022E0221	2012	56	94	1	4	.	.
